# Supplementary material
Source: MDPI journal article supplement (https://www.mdpi.com/2073-4344/13/7/1060)
Supplement: s1 [file s1]

## Supporting Information

# Copper-Catalyzed *N*-Arylation of Pyranoquinolinones with Boronic Acids at Room Temperature without Ligand

Wei Gao <sup>1</sup>, Fang Gao <sup>2</sup>, Haikuan Yang <sup>1</sup>, Zongde Wang <sup>3</sup> and Yaru Huang <sup>3,\*</sup>

<sup>1</sup> Jiangxi Academy of Forestry, Camphor Engineering Research Center of National Forestry and Grassland Administration, Nanchang 330032, China; kunshanyu321@163.com (W.G.); yanghaikuan1985@163.com (H.Y.)

<sup>2</sup> Yongfeng County Natural Resources Bureau, Yongfeng 331500, China; 15949665607@163.com

<sup>3</sup> East China Woody Fragrance and Flavor Engineering Research Center of National Forestry and Grassland Administration, College of Forestry, Jiangxi Agricultural University, Nanchang 330045, China; zongdewang@163.com

\* Correspondence: huangyaru12@163.com

## Table of Contents

### I. NMR Spectra

1

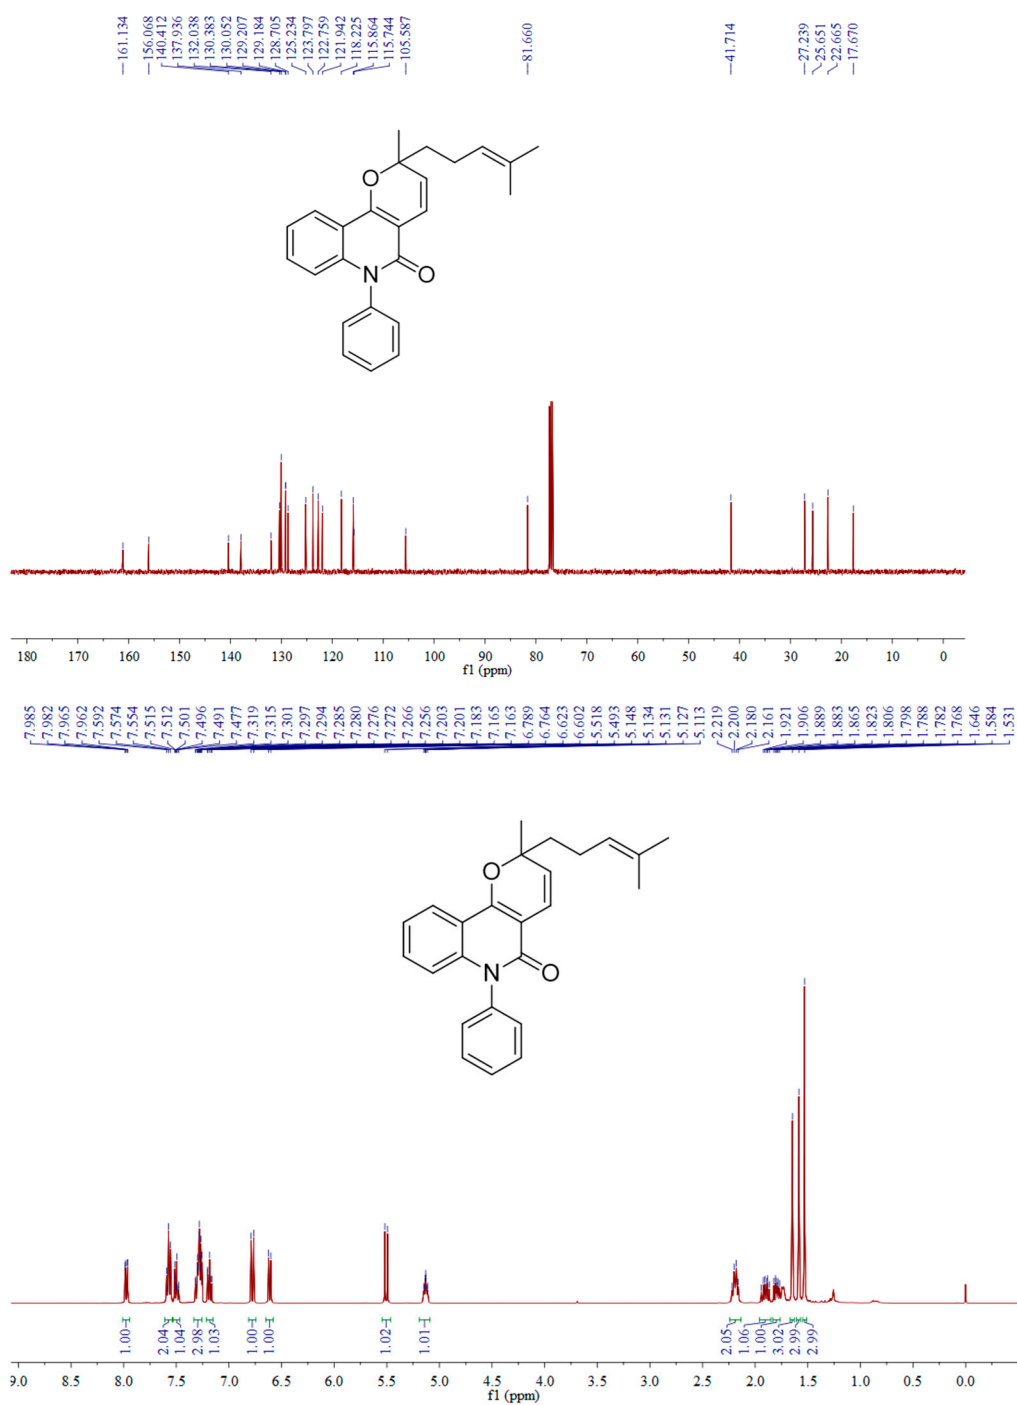

**Figure S1.** <sup>13</sup>C NMR and <sup>1</sup>H NMR (CDCl<sub>3</sub>) spectrum of compound 3a

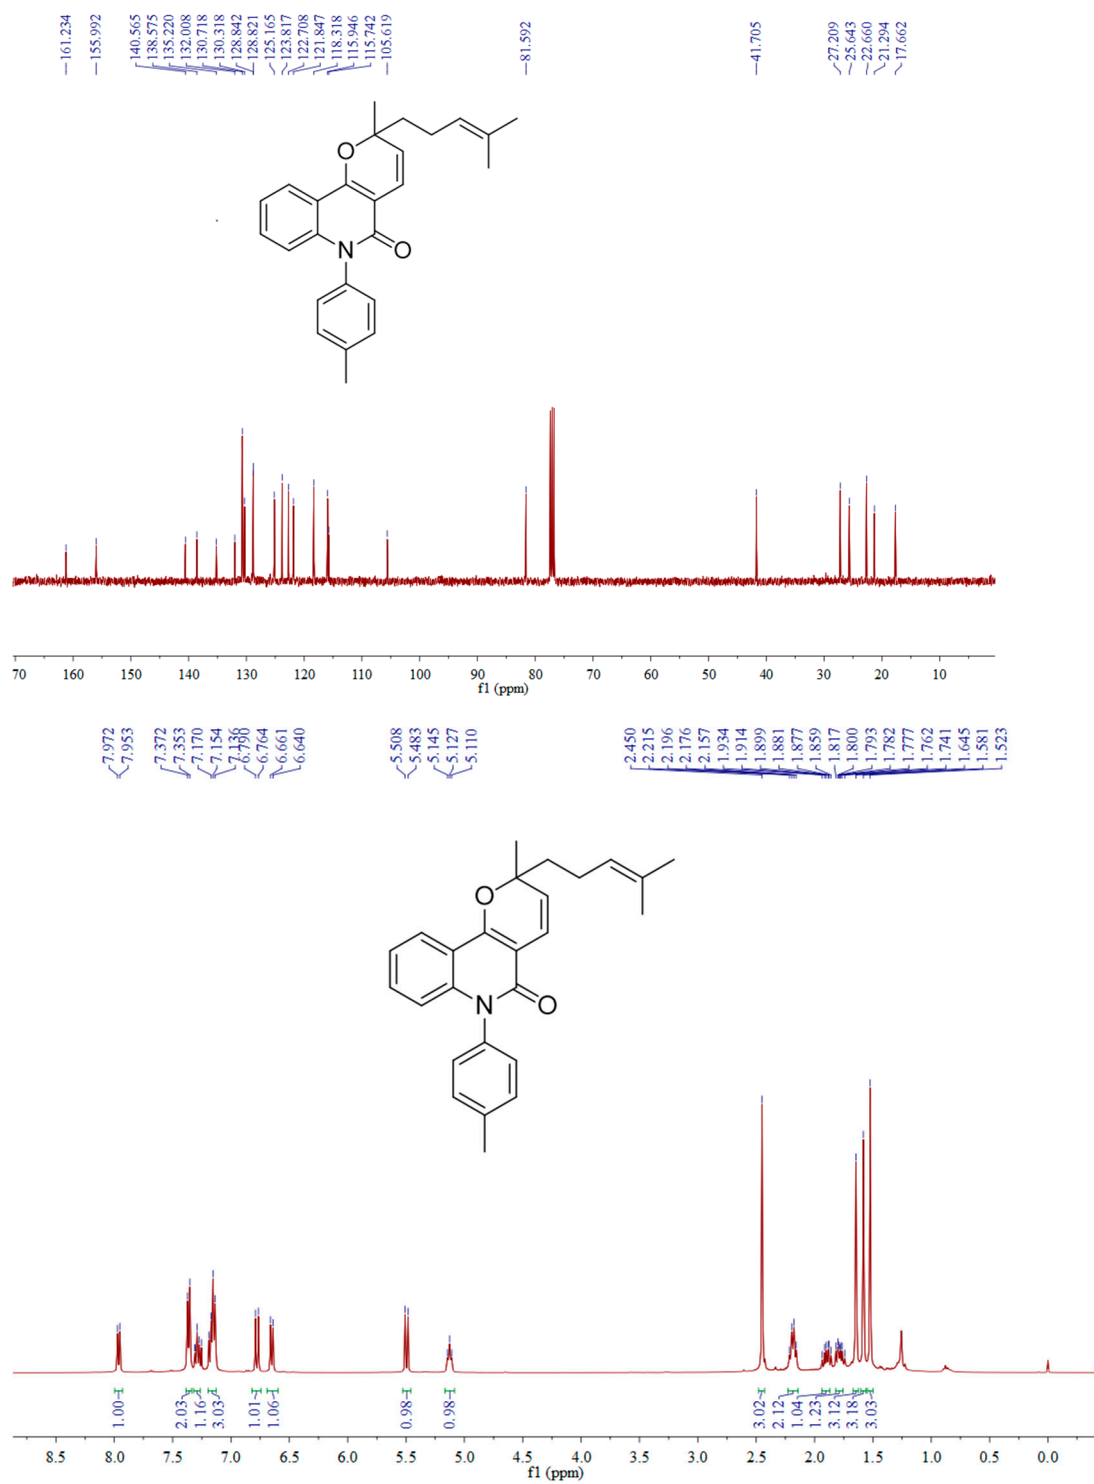

**Figure S2.** <sup>13</sup>C NMR and <sup>1</sup>H NMR (CDCl<sub>3</sub>) spectrum of compound **3b**

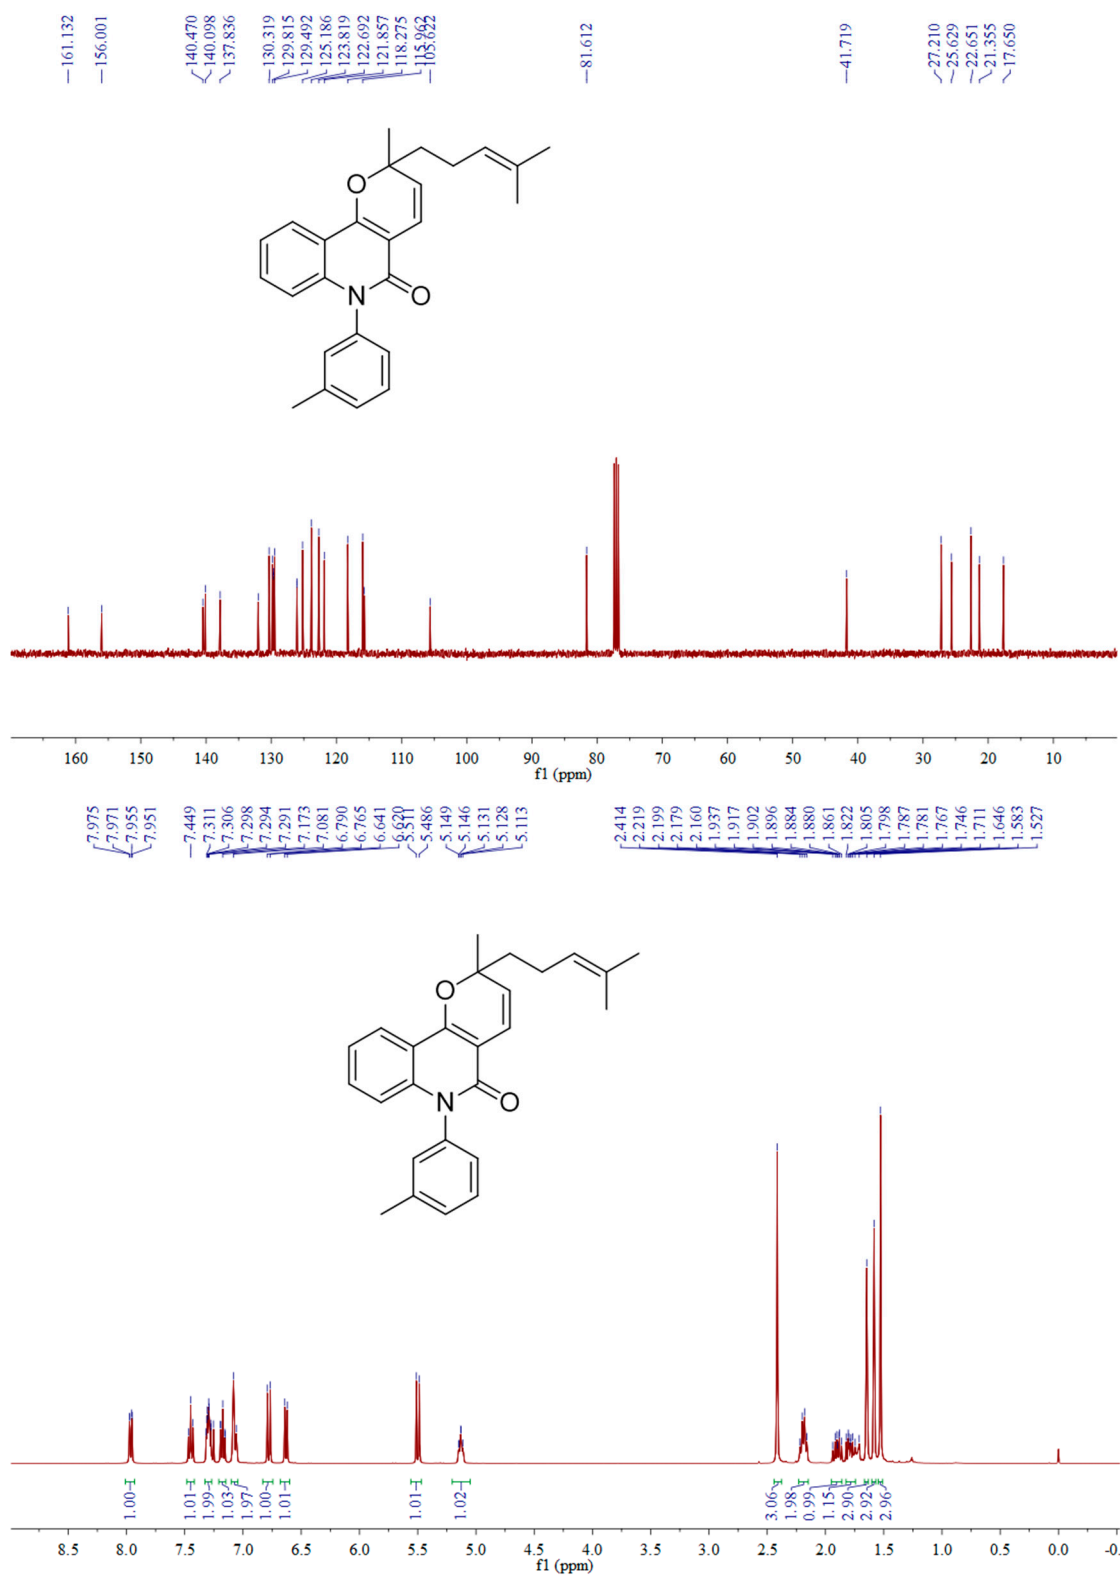

**Figure S3.** <sup>13</sup>C NMR and <sup>1</sup>H NMR (CDCl<sub>3</sub>) spectrum of compound **3c**



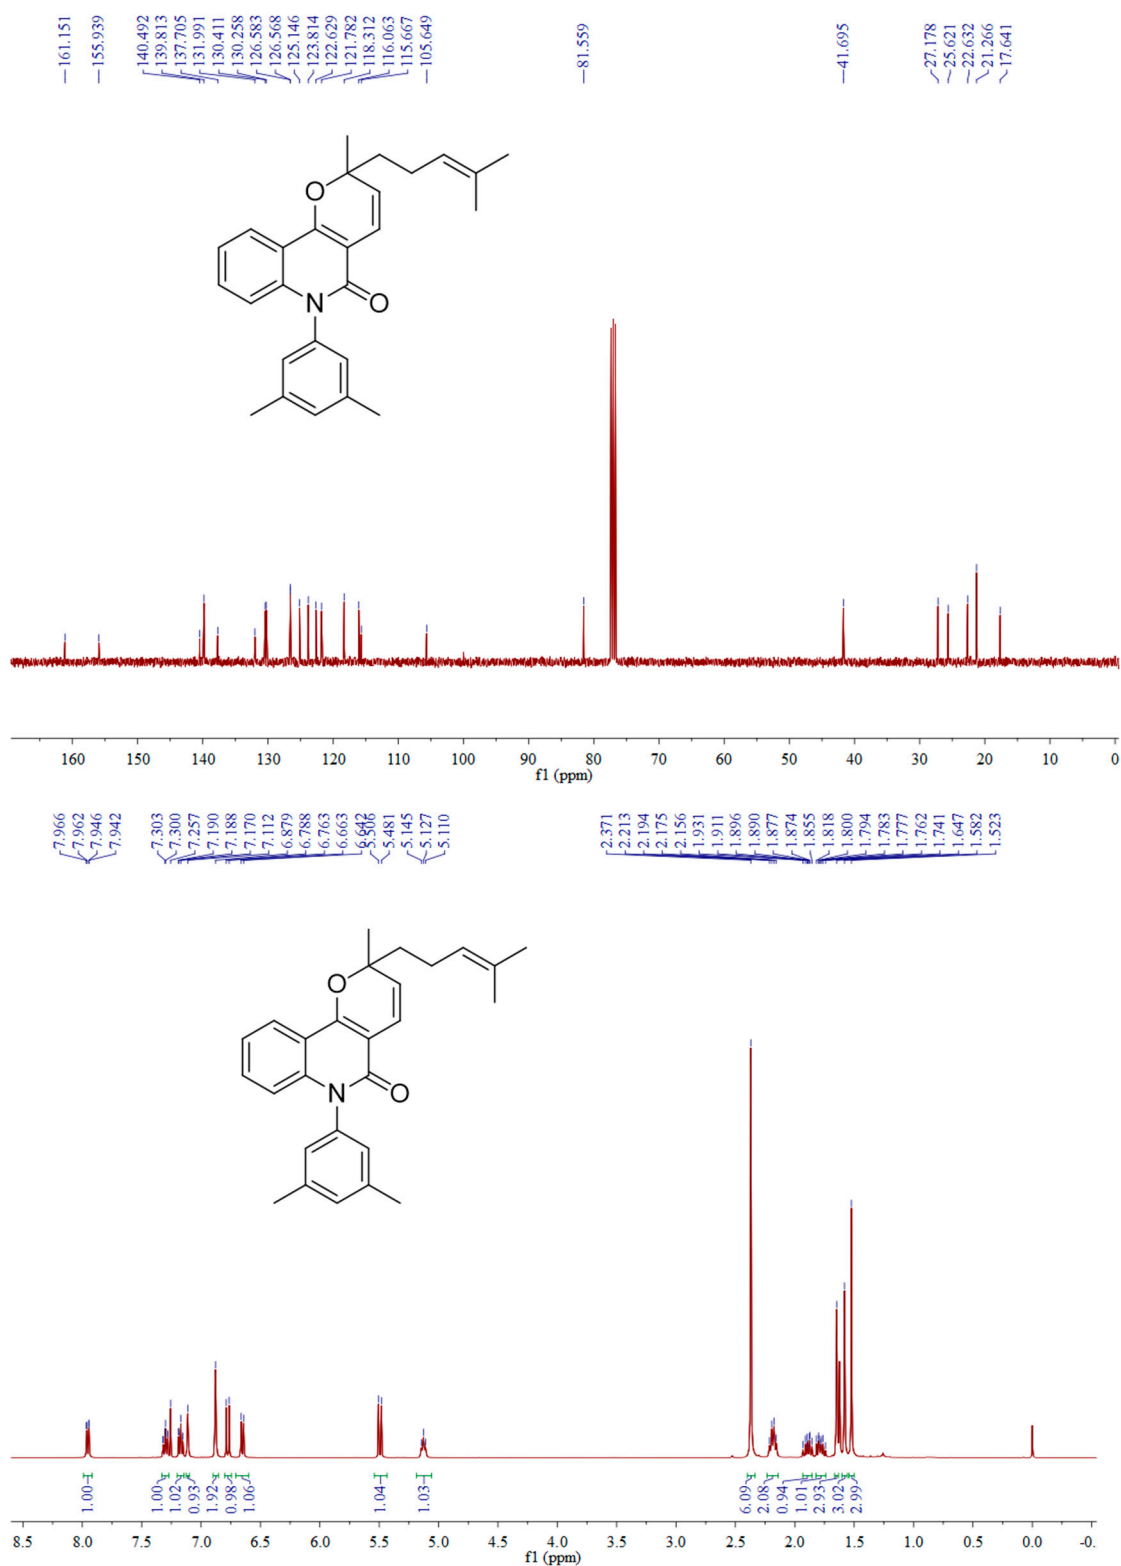

**Figure S4.** <sup>13</sup>C NMR and <sup>1</sup>H NMR (CDCl<sub>3</sub>) spectrum of compound **3d**

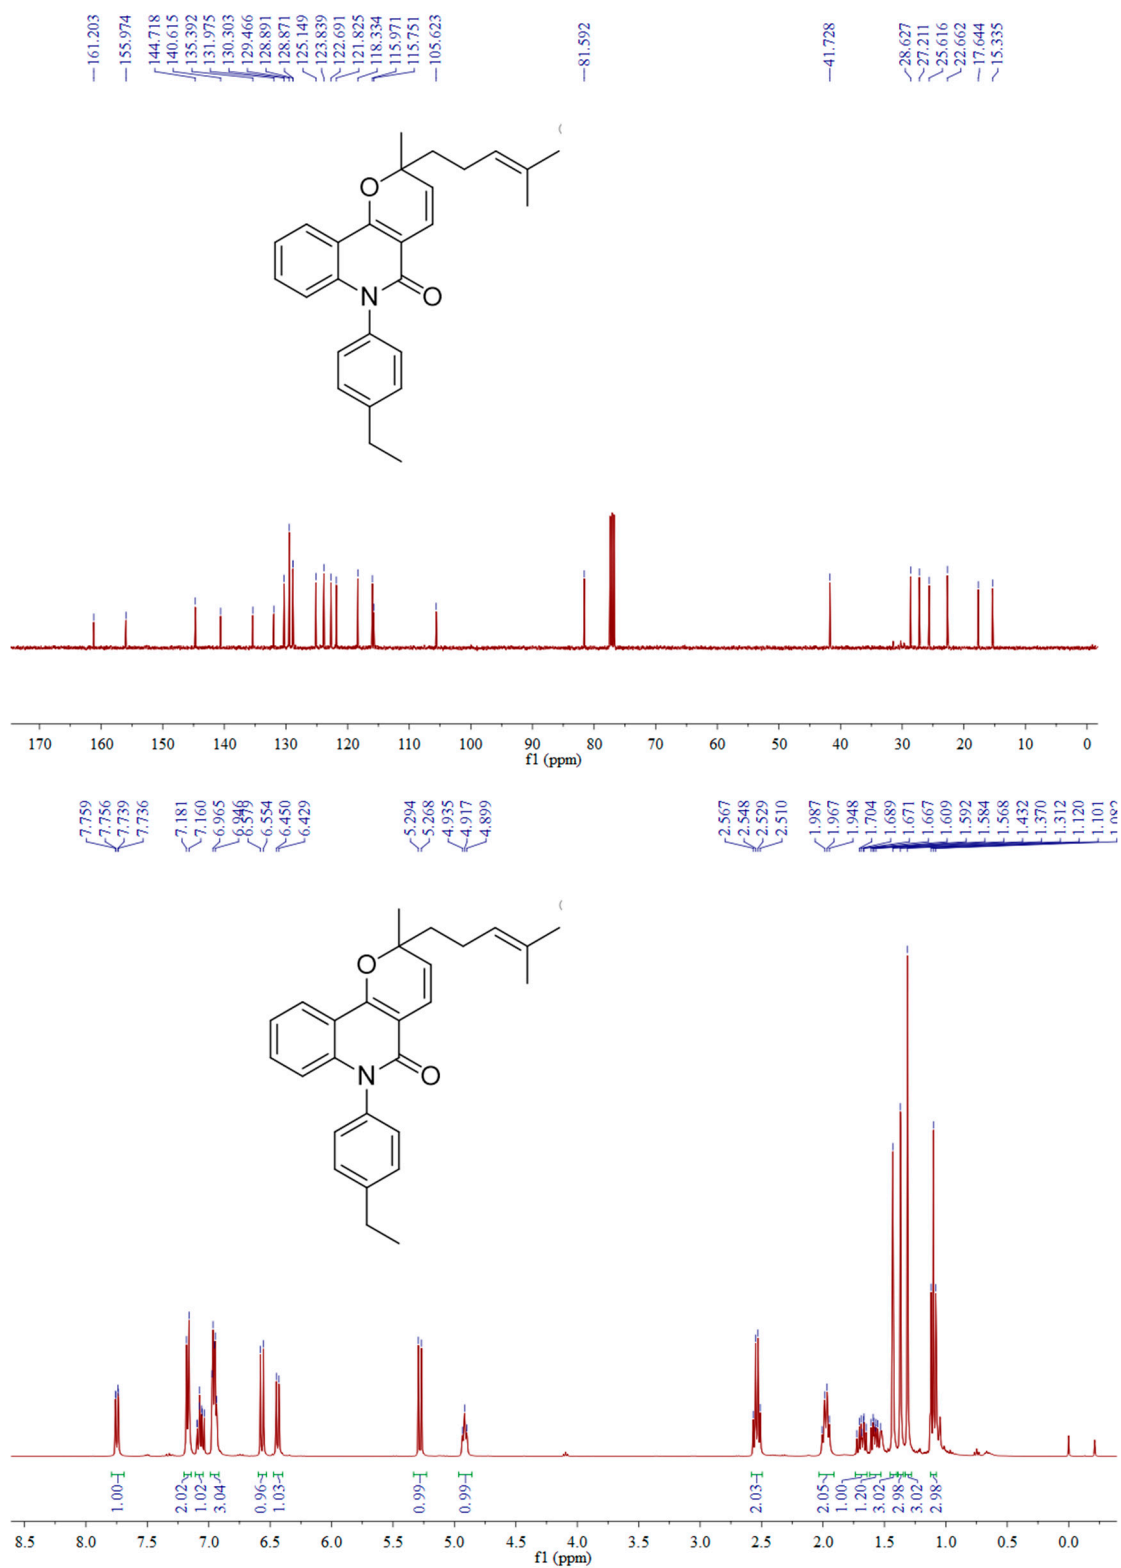

**Figure S5.** <sup>13</sup>C NMR and <sup>1</sup>H NMR (CDCl<sub>3</sub>) spectrum of compound **3e**

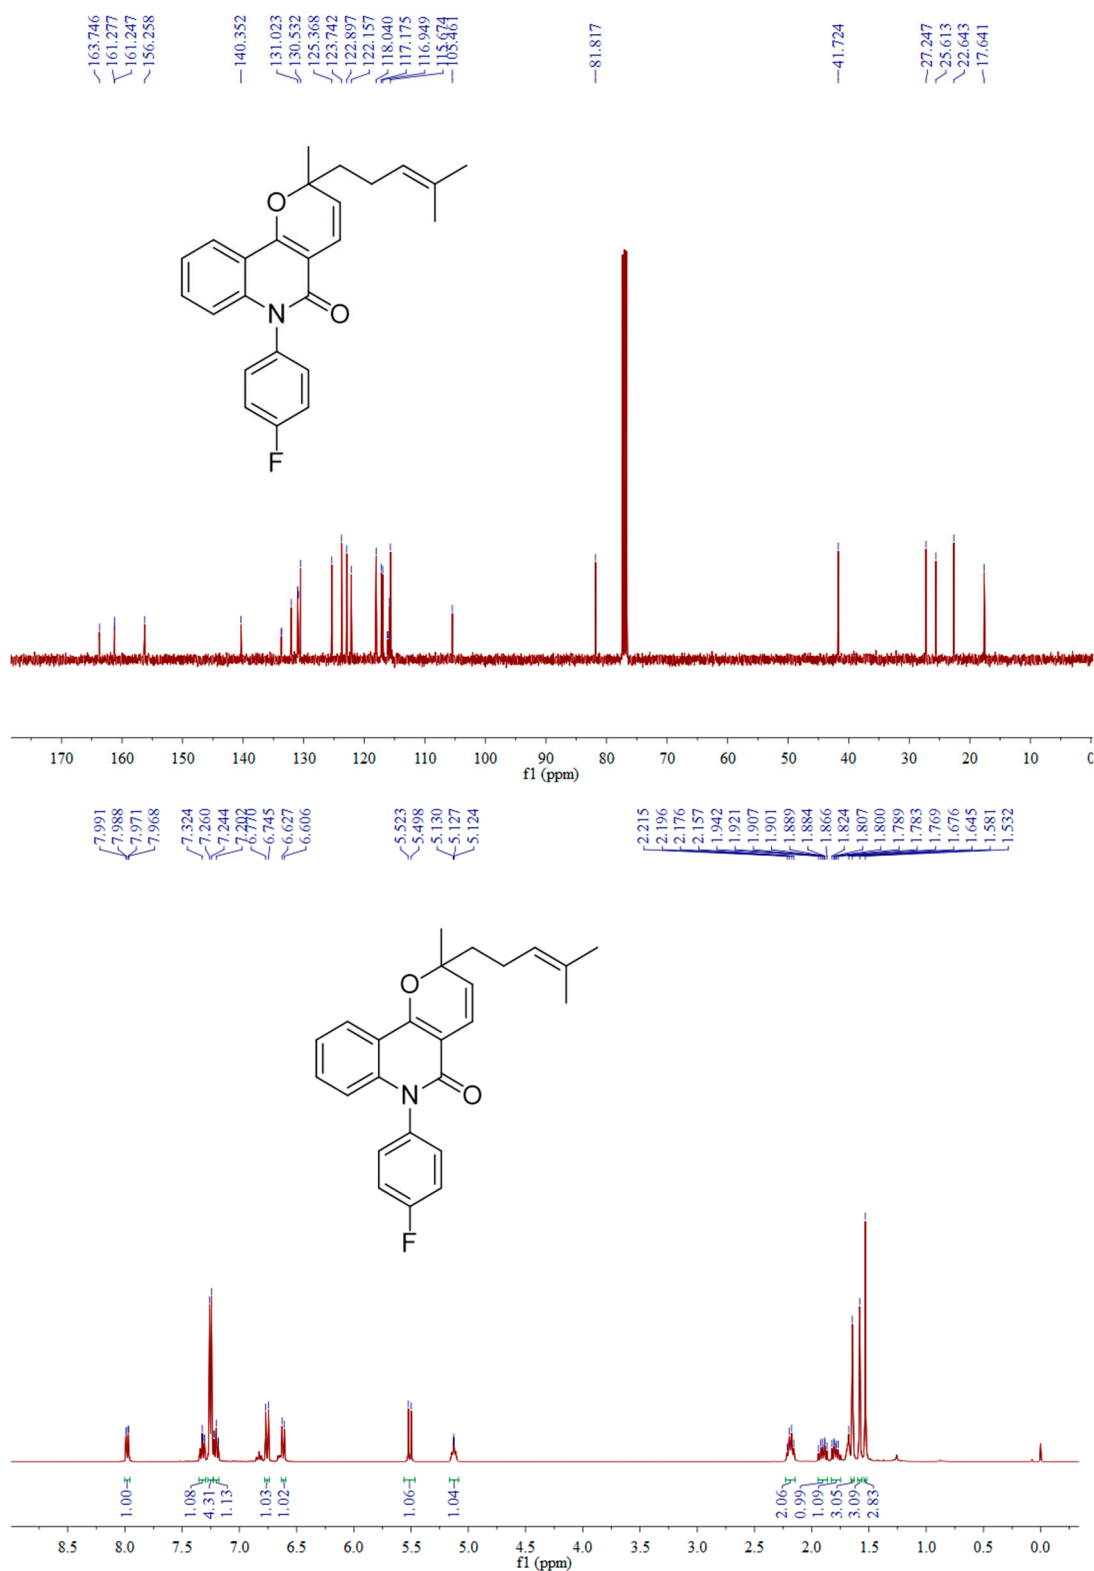

**Figure S6.** <sup>13</sup>C NMR and <sup>1</sup>H NMR (CDCl<sub>3</sub>) spectrum of compound **3f**

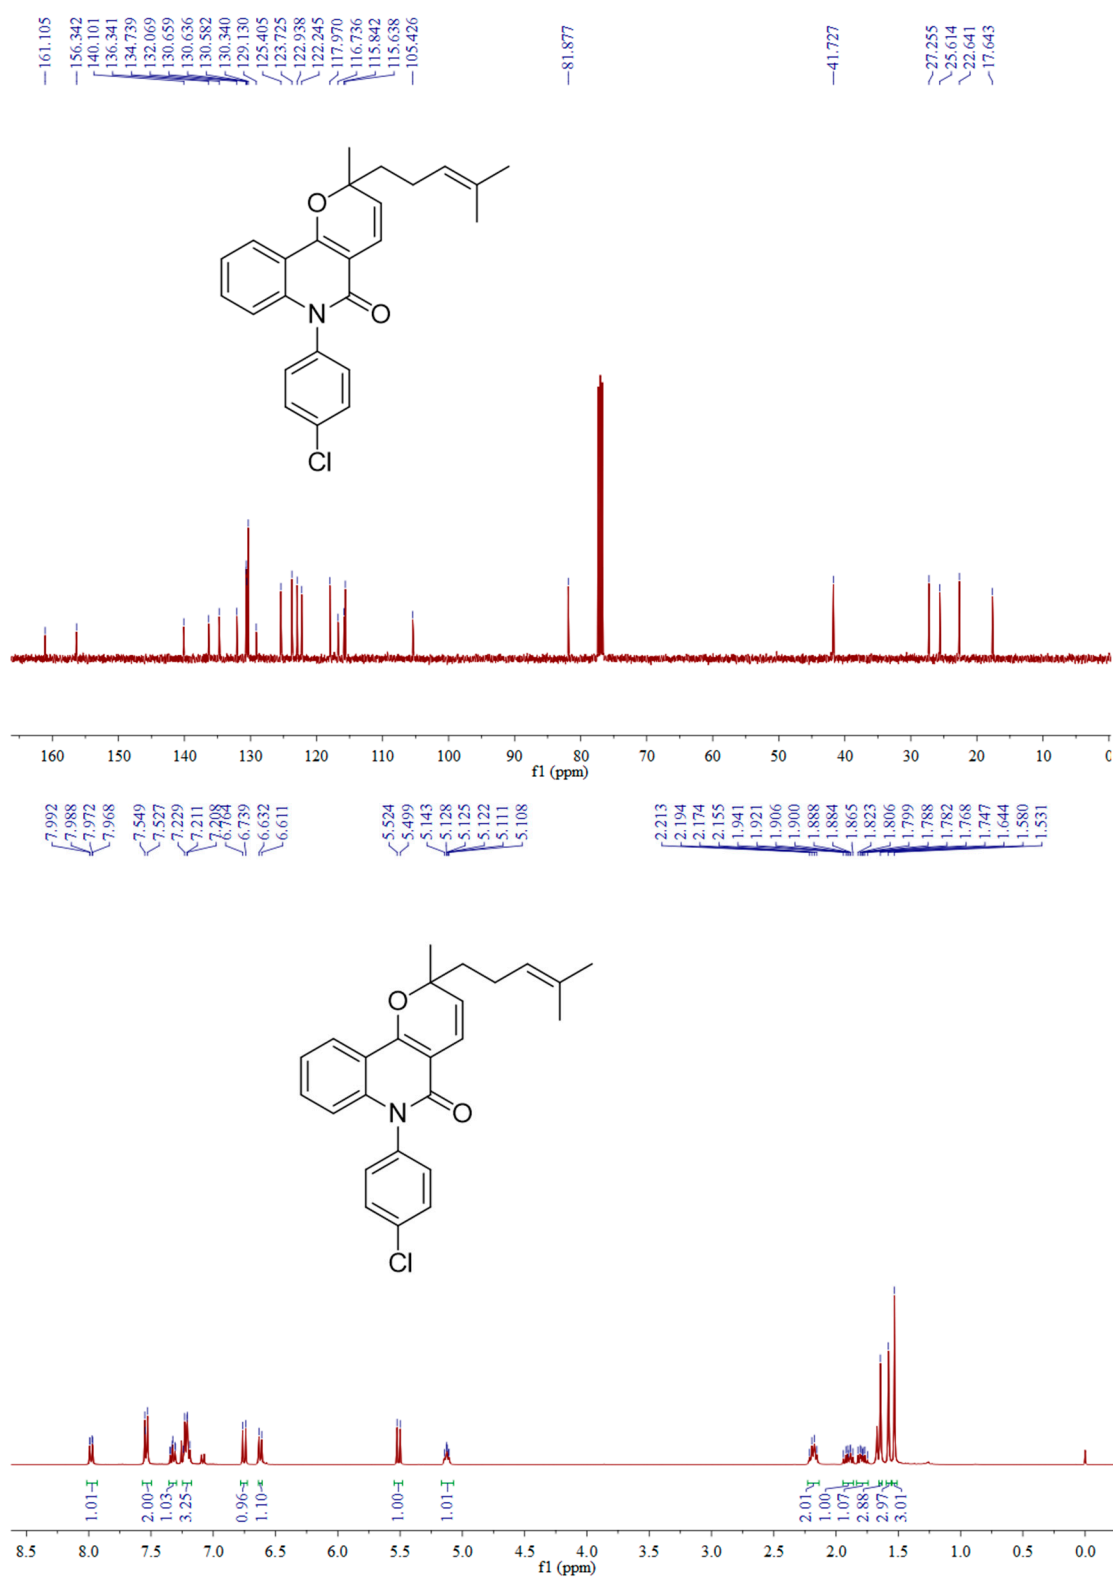

**Figure S7.** <sup>13</sup>C NMR and <sup>1</sup>H NMR (CDCl<sub>3</sub>) spectrum of compound **3g**

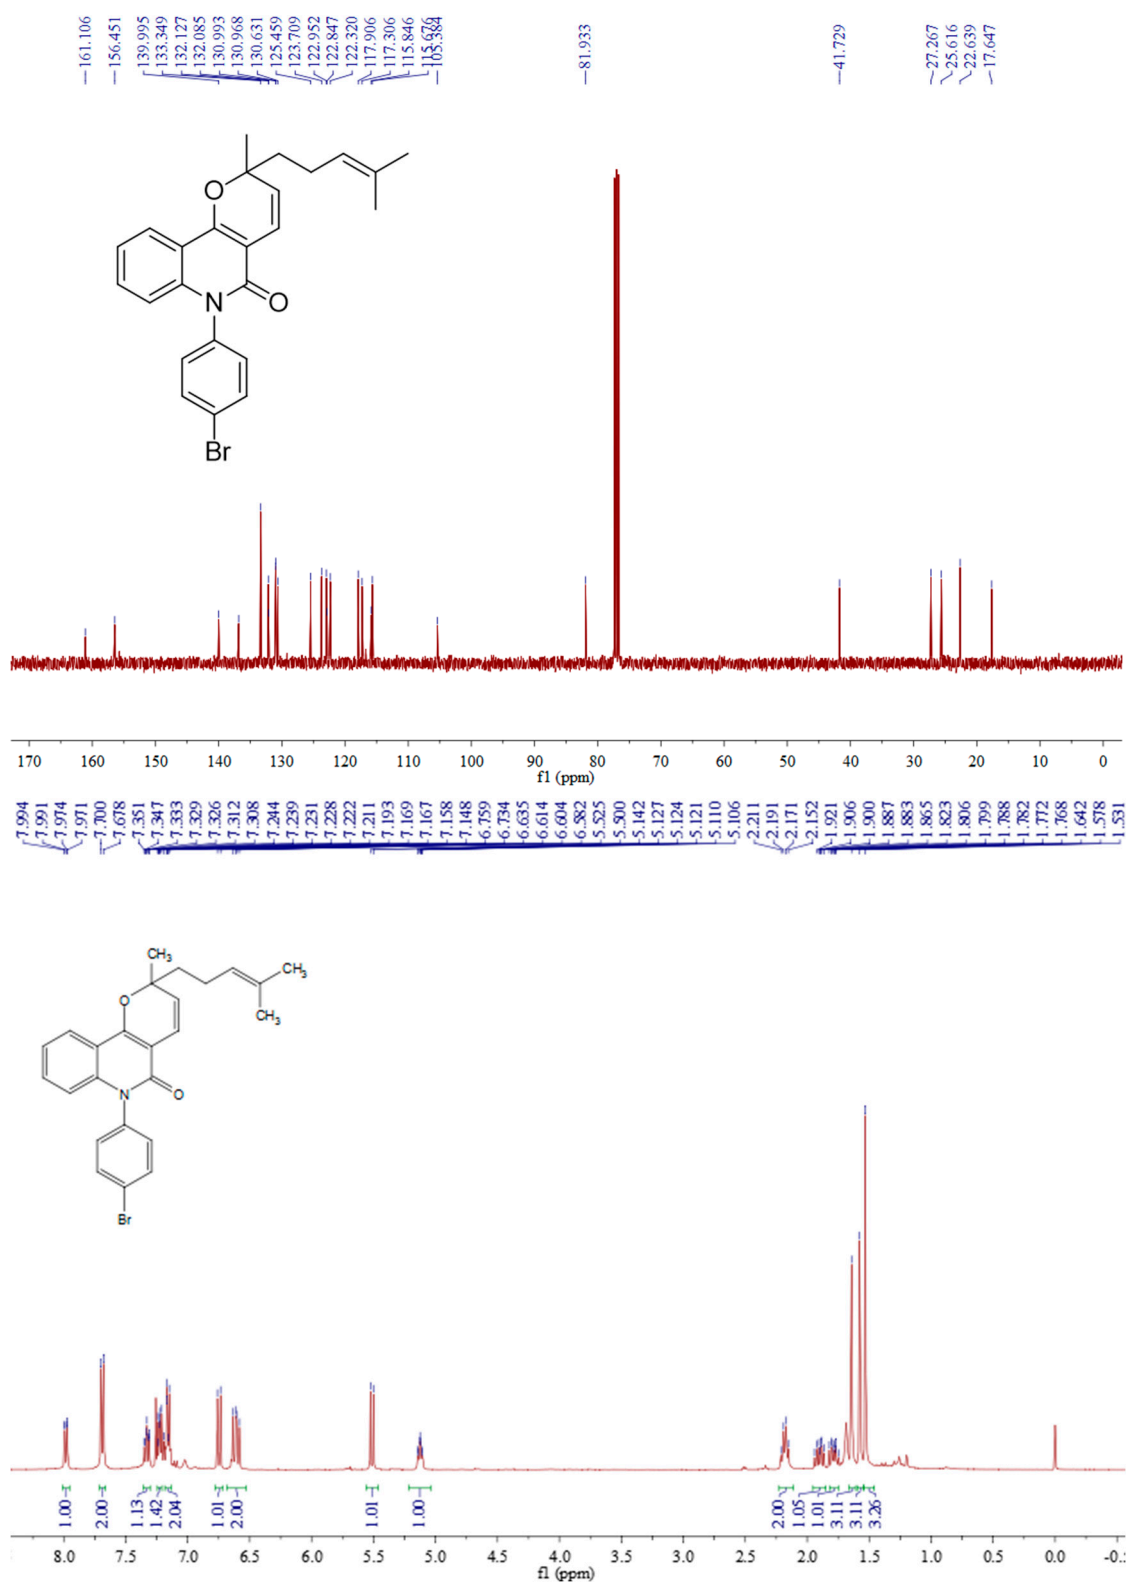

**Figure S8.** <sup>13</sup>C NMR and <sup>1</sup>H NMR (CDCl<sub>3</sub>) spectrum of compound 3h

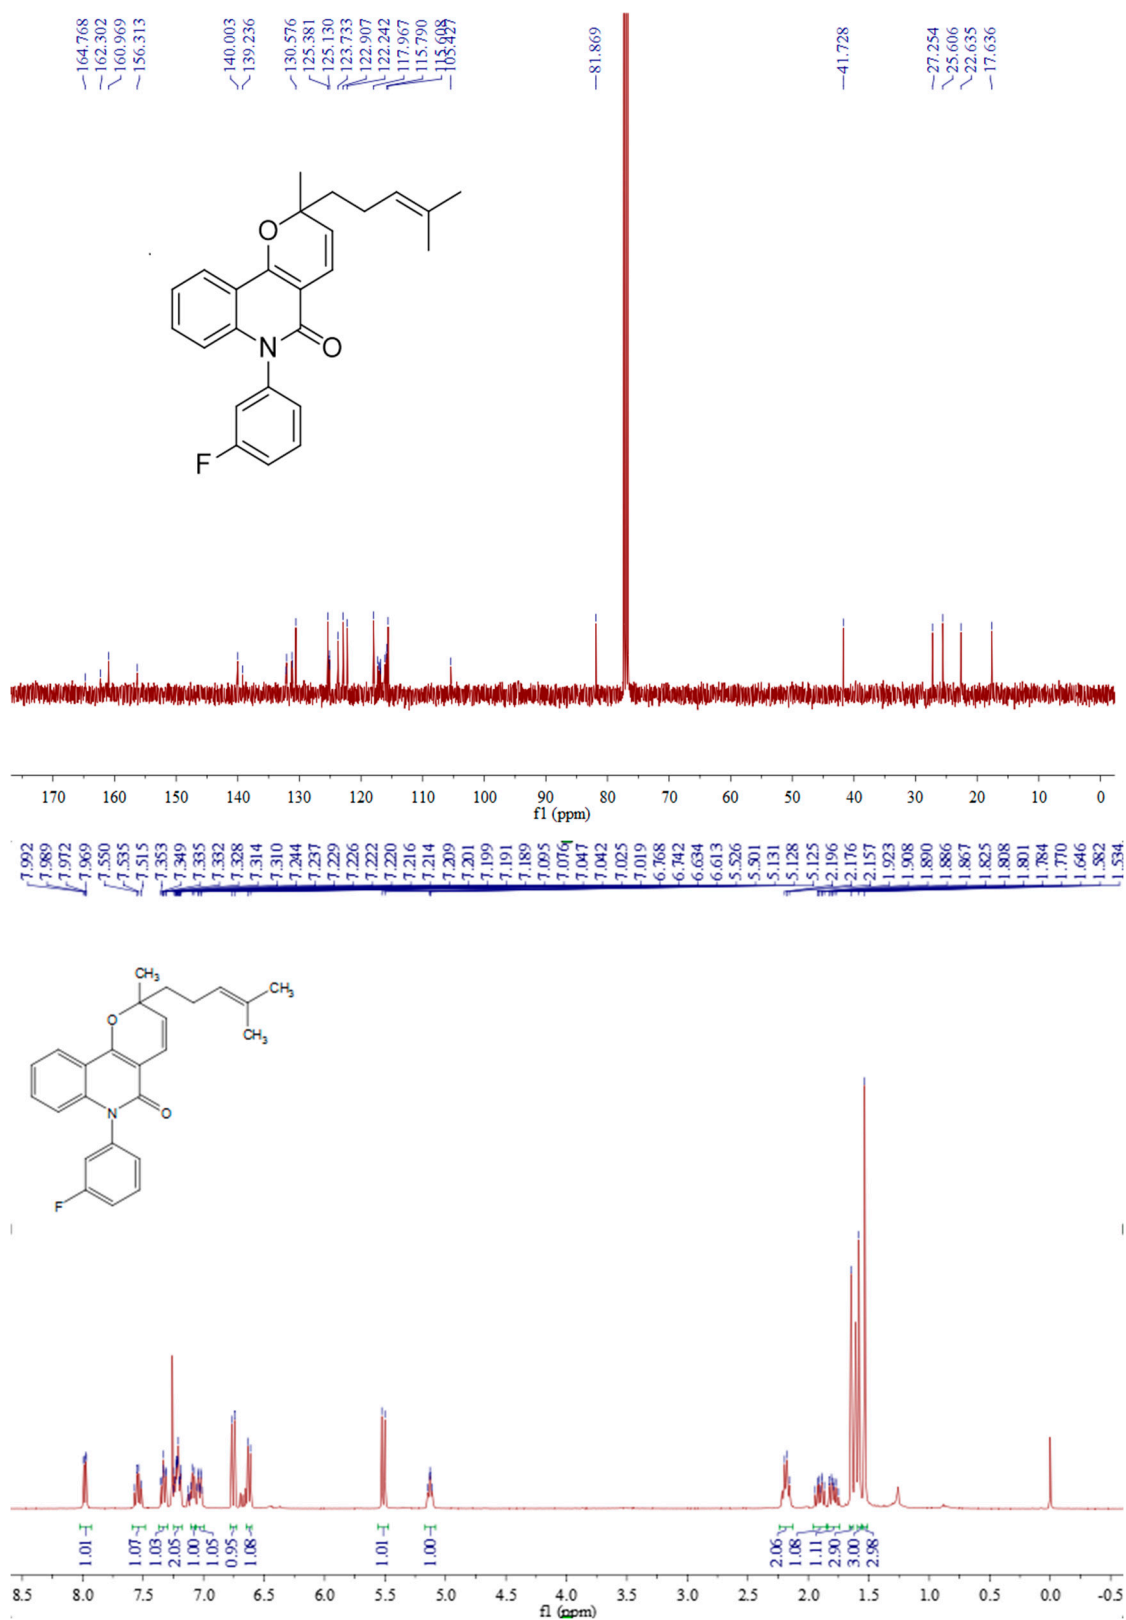

**Figure S9.** <sup>13</sup>C NMR and <sup>1</sup>H NMR (CDCl<sub>3</sub>) spectrum of compound **3i**

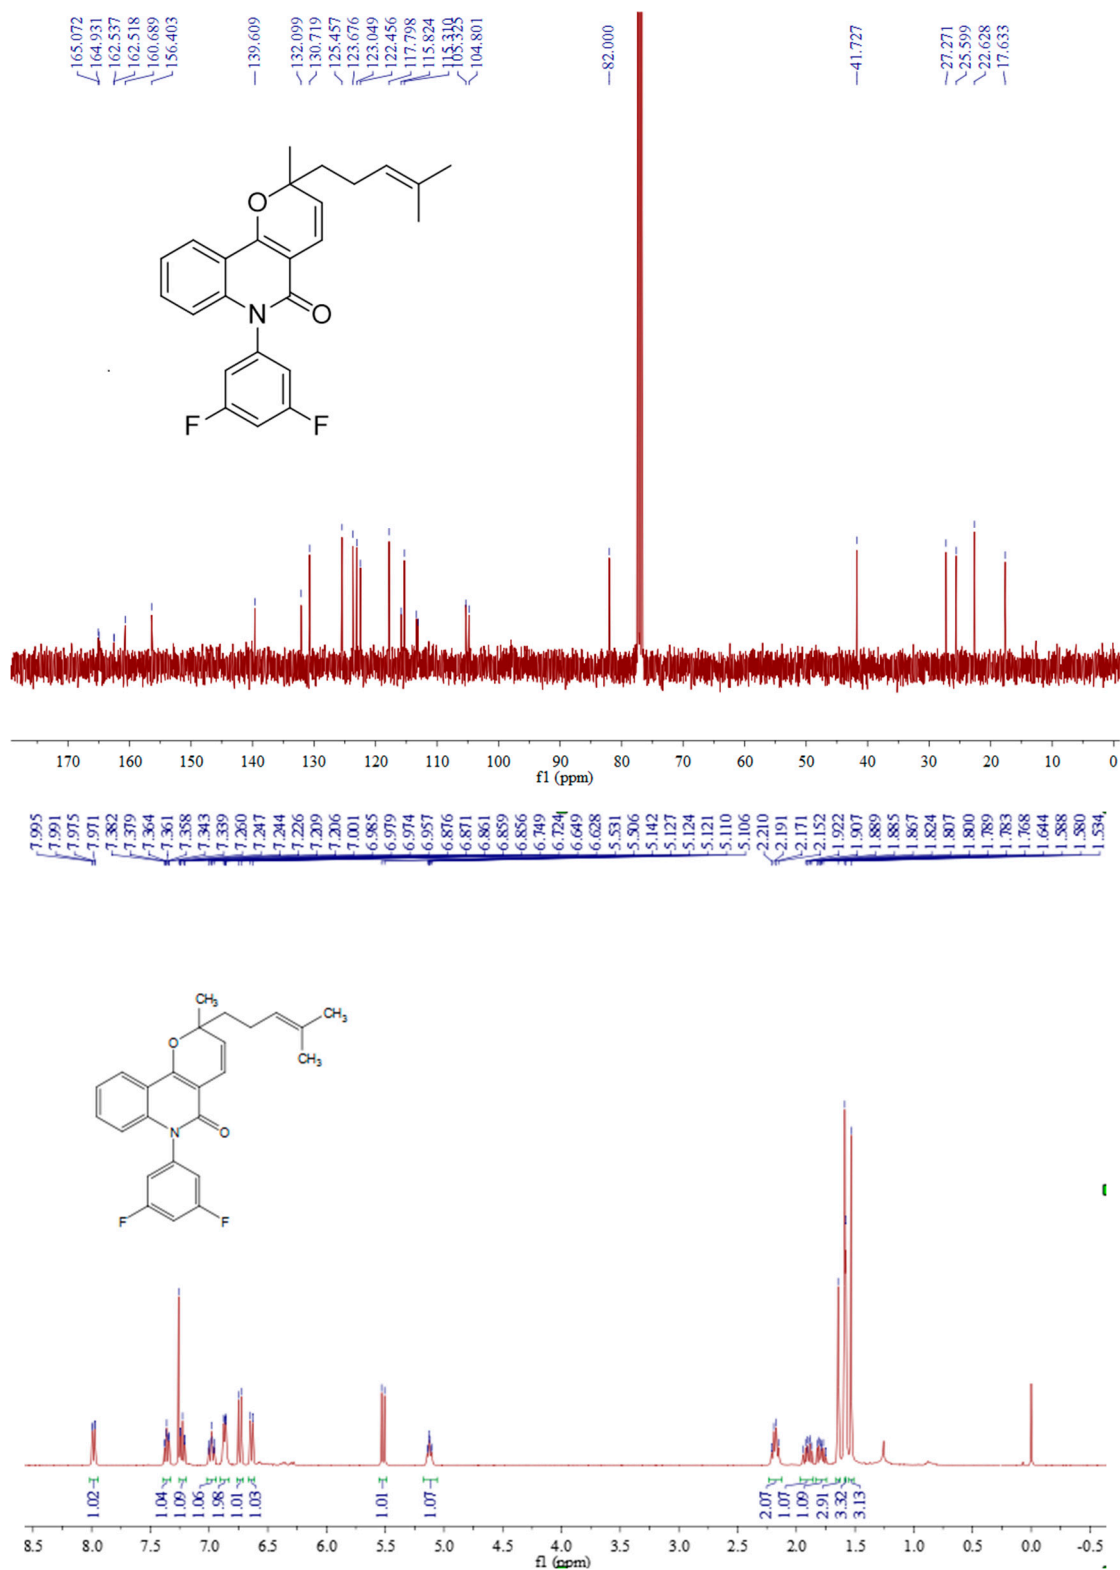

**Figure S10.** <sup>13</sup>C NMR and <sup>1</sup>H NMR (CDCl<sub>3</sub>) spectrum of compound 3j

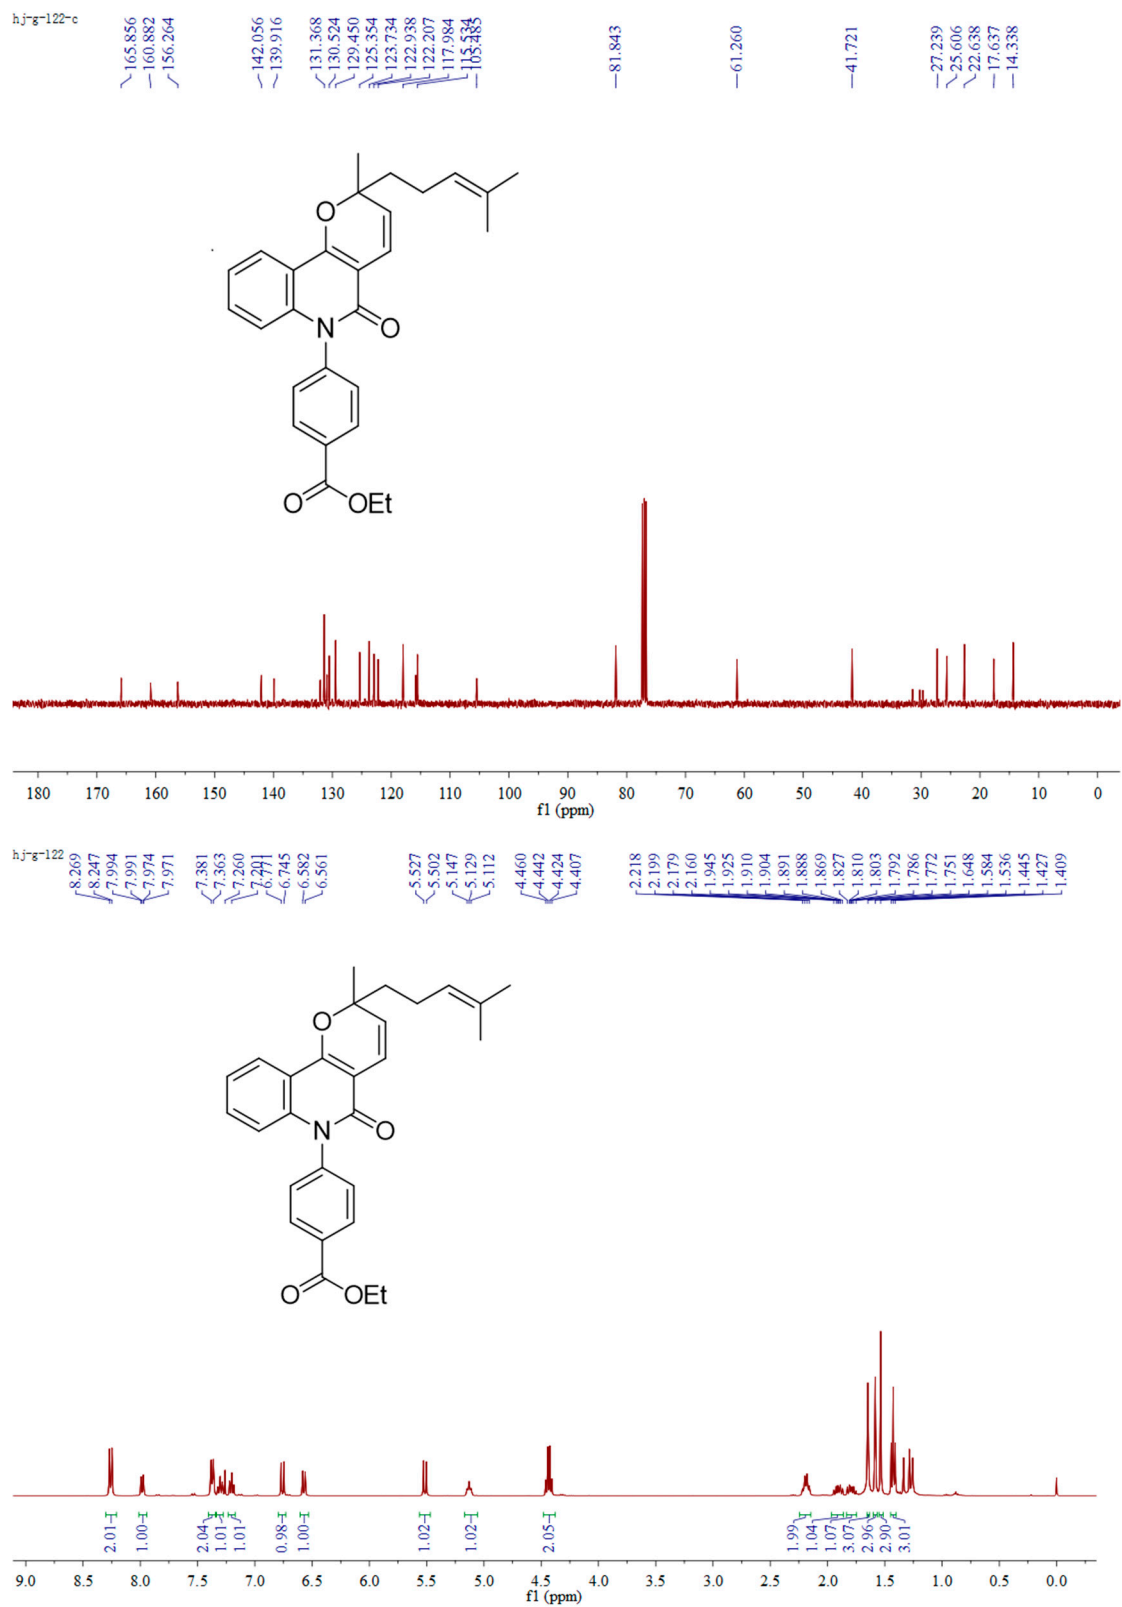

**Figure S11.** <sup>13</sup>C NMR and <sup>1</sup>H NMR (CDCl<sub>3</sub>) spectrum of compound 3k



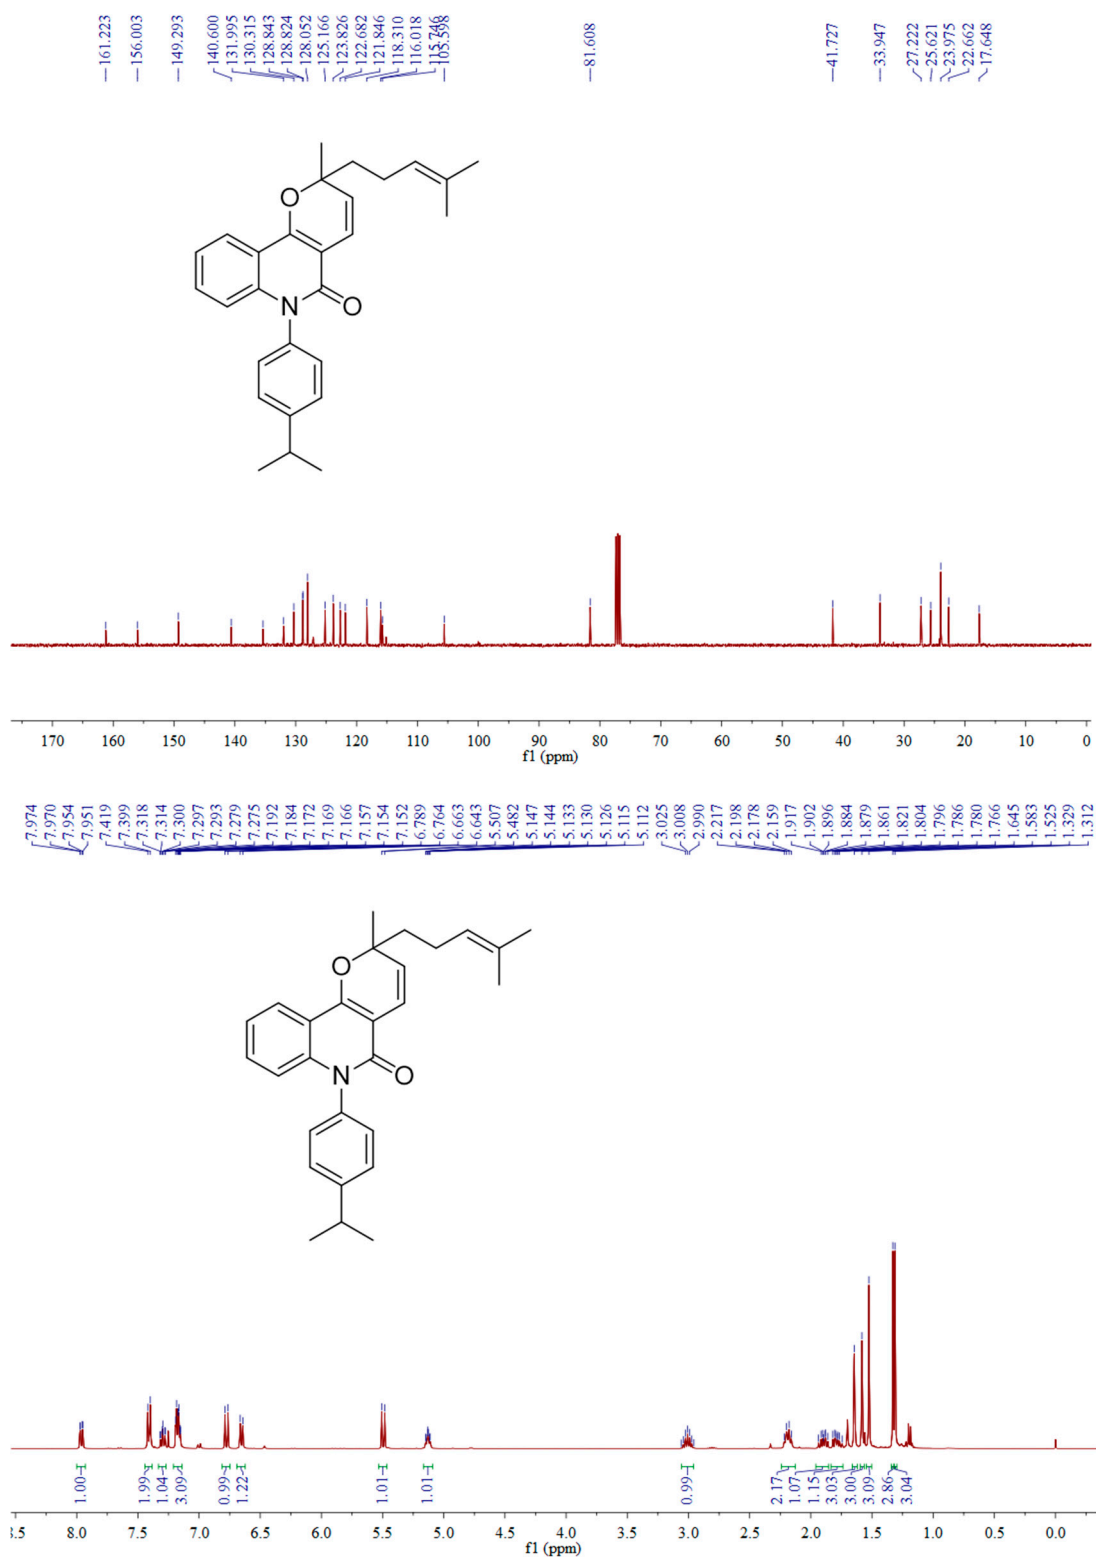

**Figure S12.** <sup>13</sup>C NMR and <sup>1</sup>H NMR (CDCl<sub>3</sub>) spectrum of compound **31**

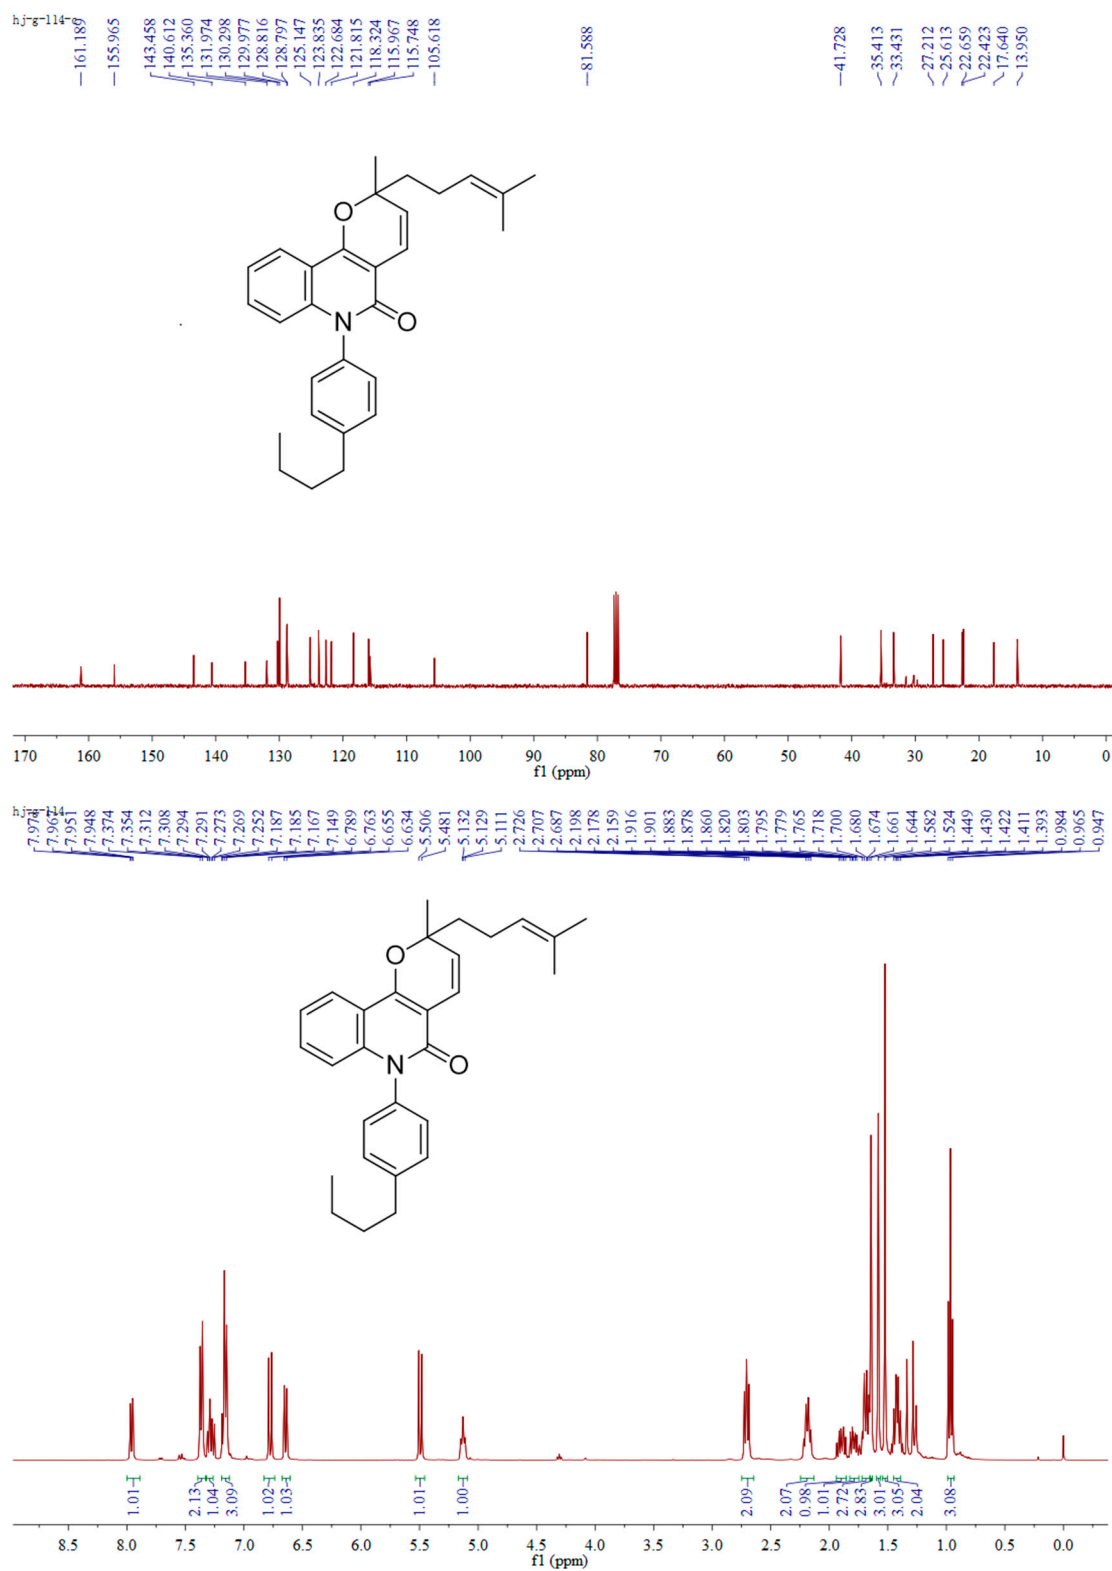

**Figure S13.**  $^{13}\text{C}$  NMR and  $^1\text{H}$  NMR ( $\text{CDCl}_3$ ) spectrum of compound **3m**

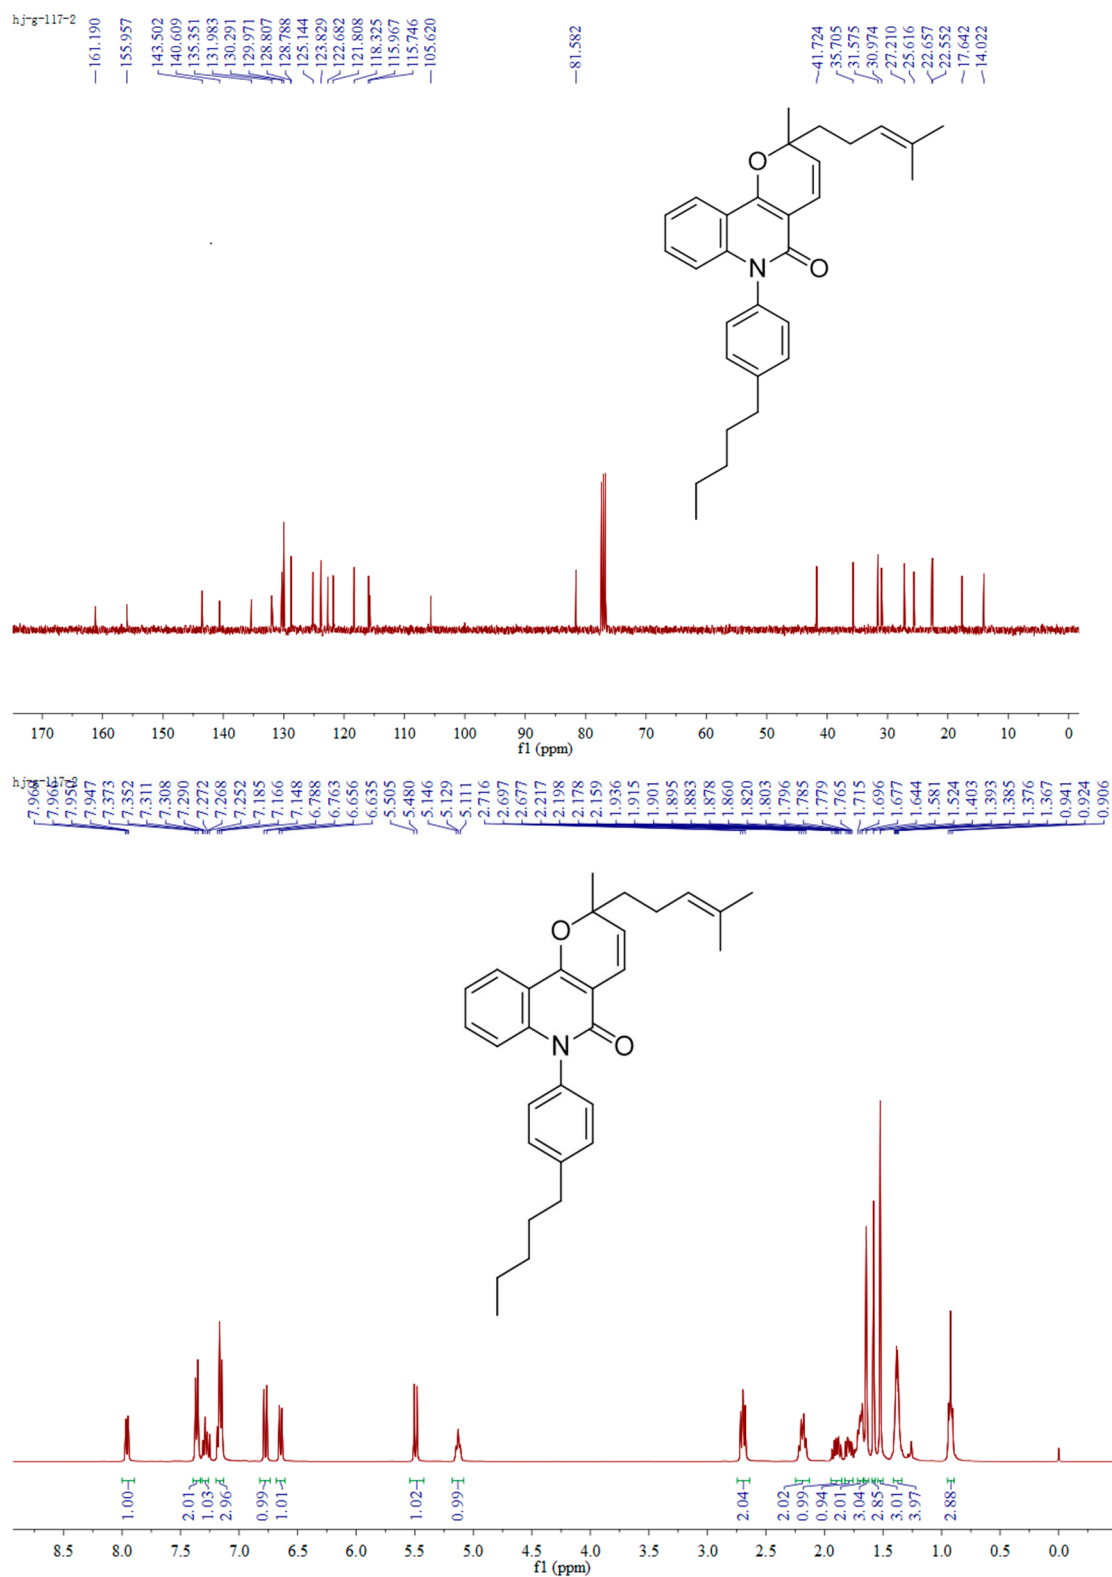

**Figure S14.**  $^{13}\text{C}$  NMR and  $^1\text{H}$  NMR ( $\text{CDCl}_3$ ) spectrum of compound **3n**

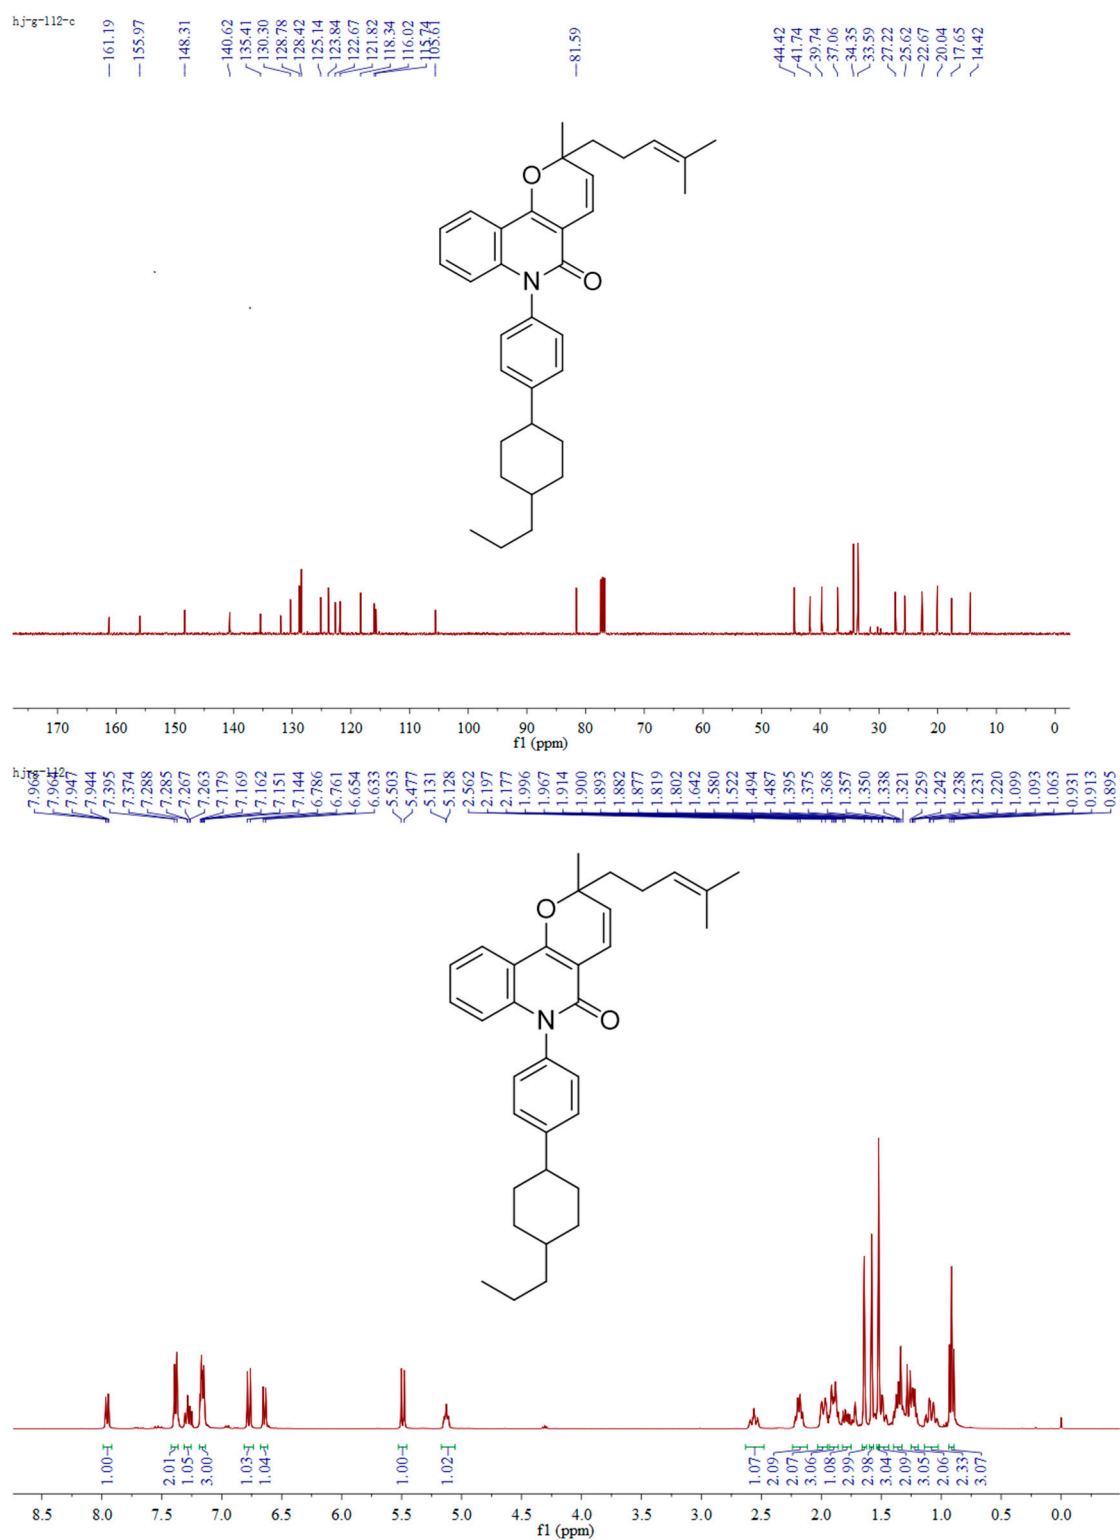

**Figure S15.** <sup>13</sup>C NMR and <sup>1</sup>H NMR (CDCl<sub>3</sub>) spectrum of compound **30**

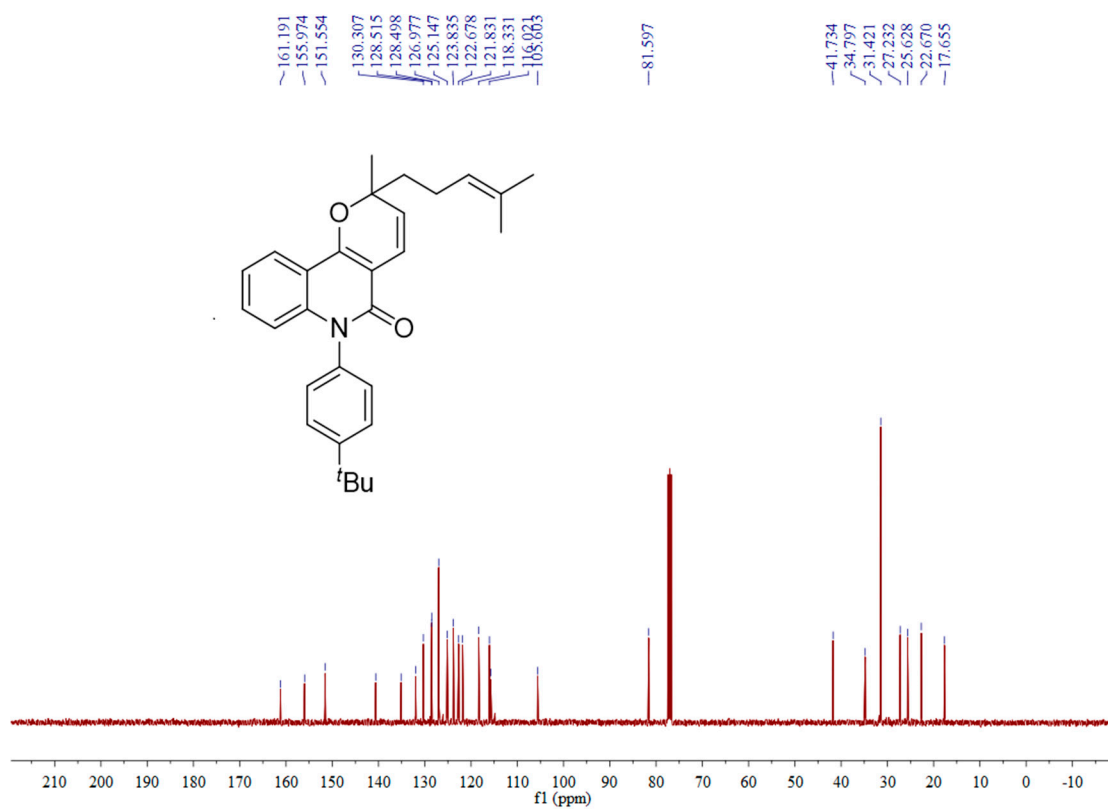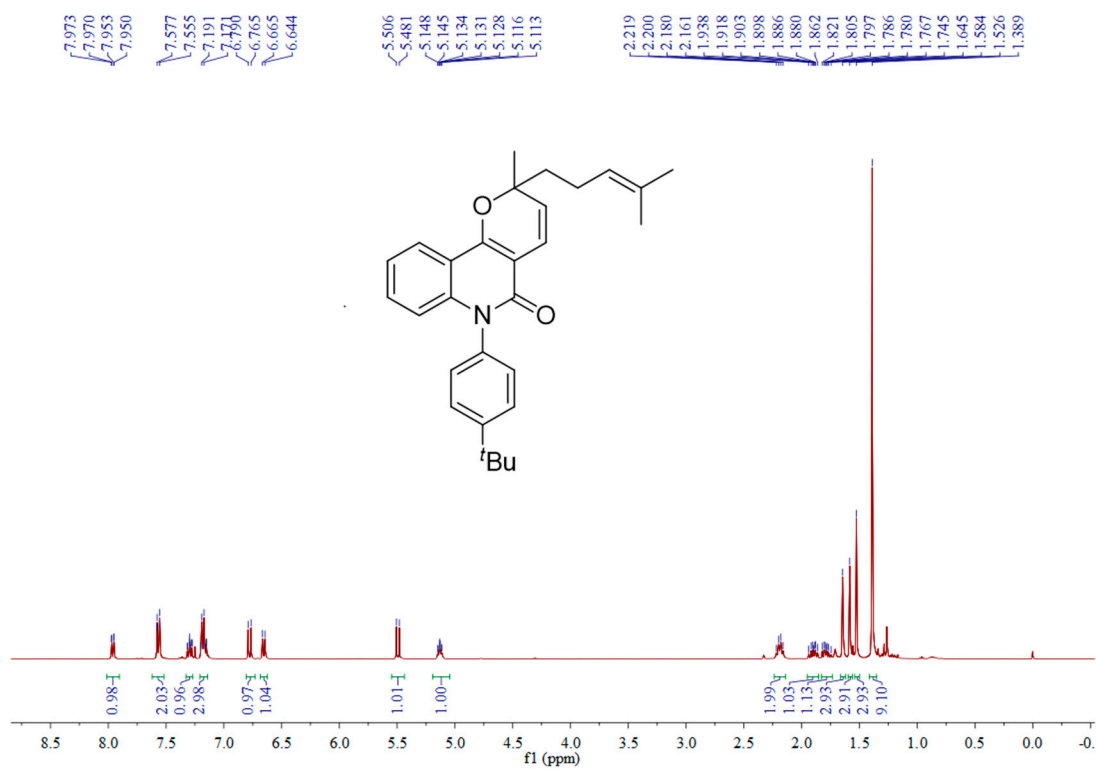

Figure S16. <sup>13</sup>C NMR and <sup>1</sup>H NMR (CDCl<sub>3</sub>) spectrum of compound 3p

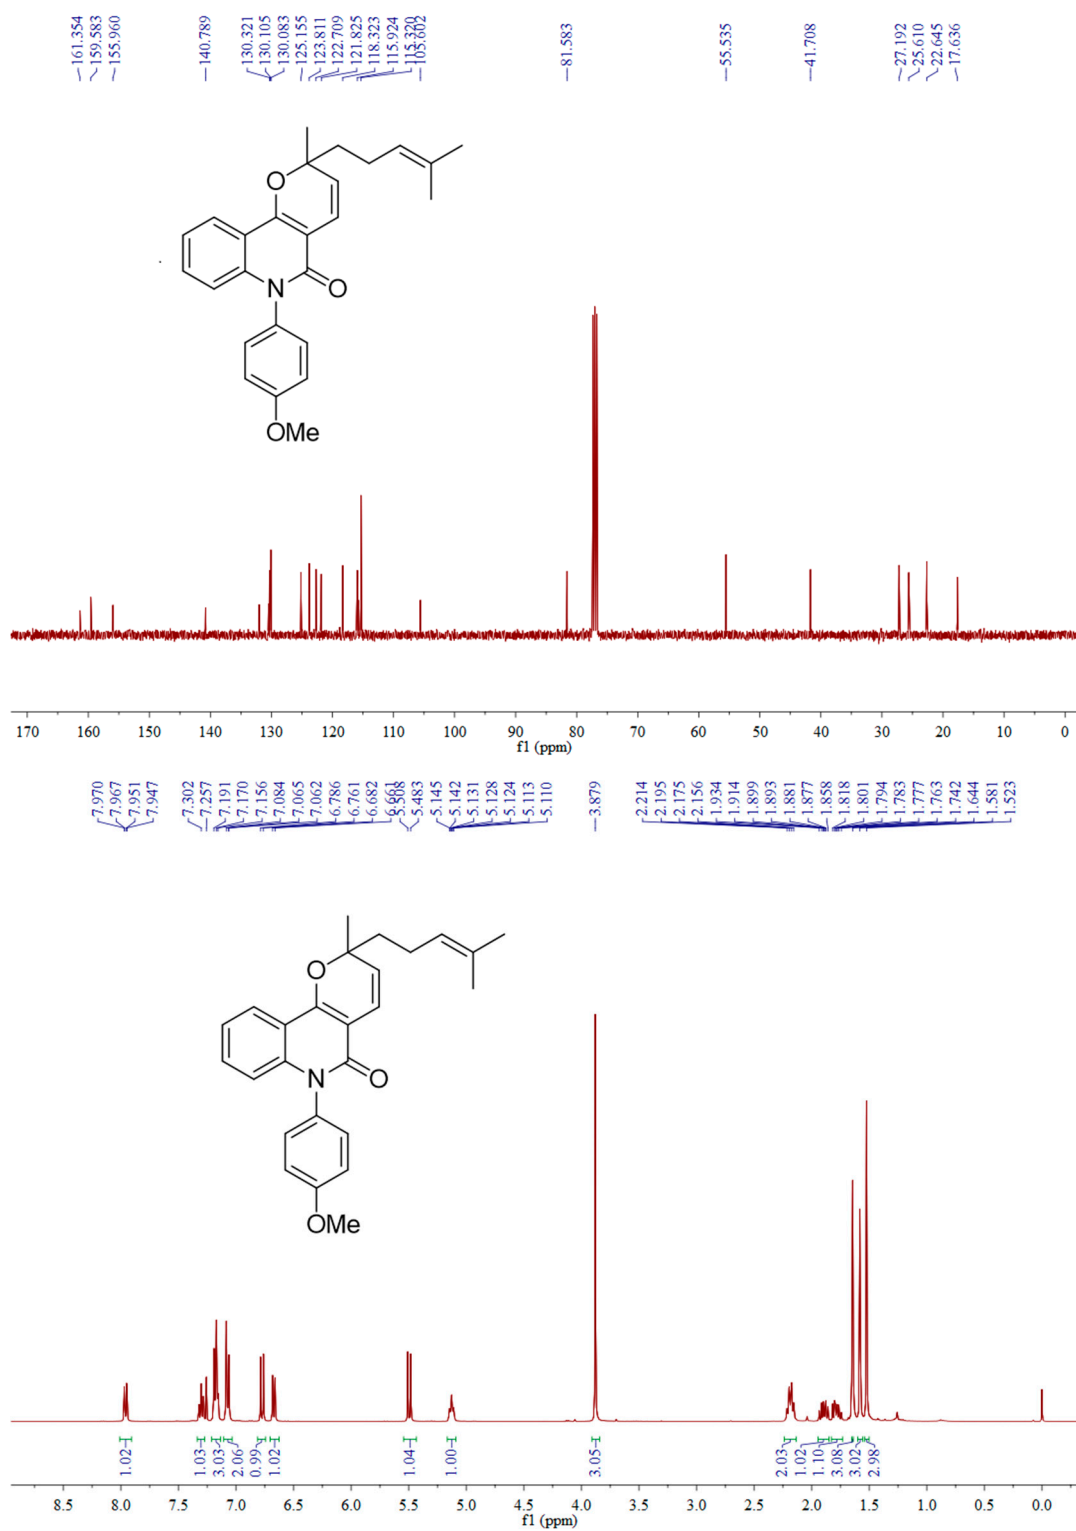

**Figure S17.** <sup>13</sup>C NMR and <sup>1</sup>H NMR (CDCl<sub>3</sub>) spectrum of compound **3q**

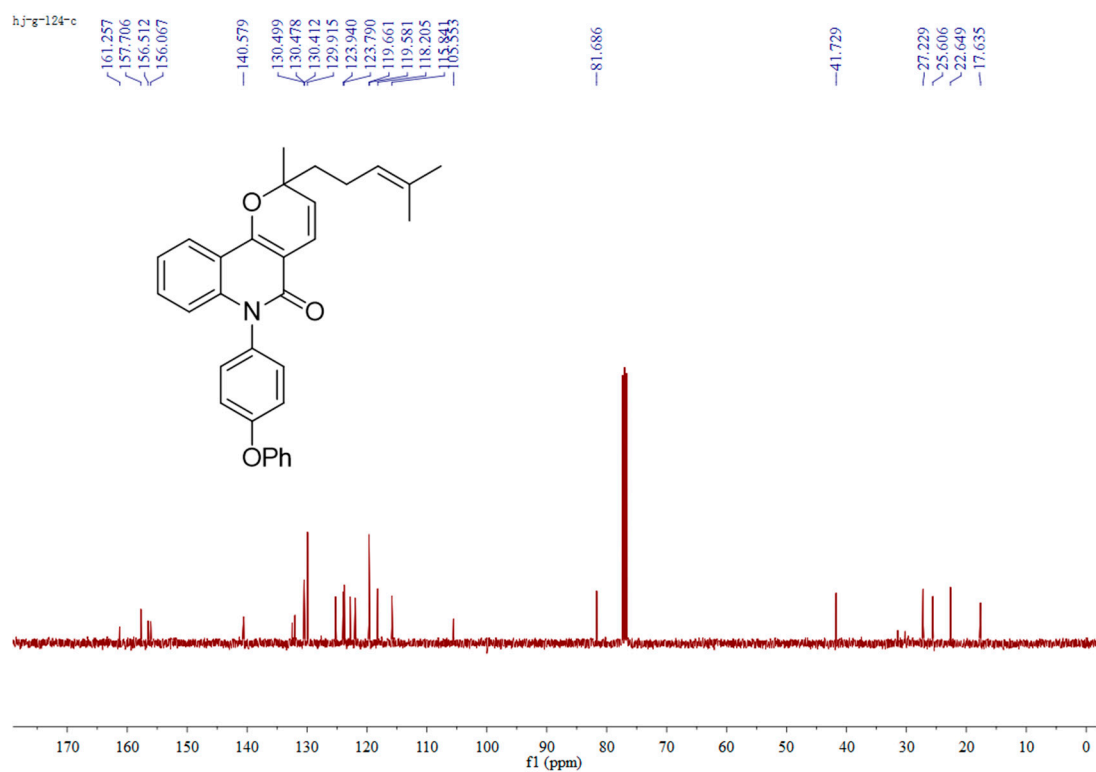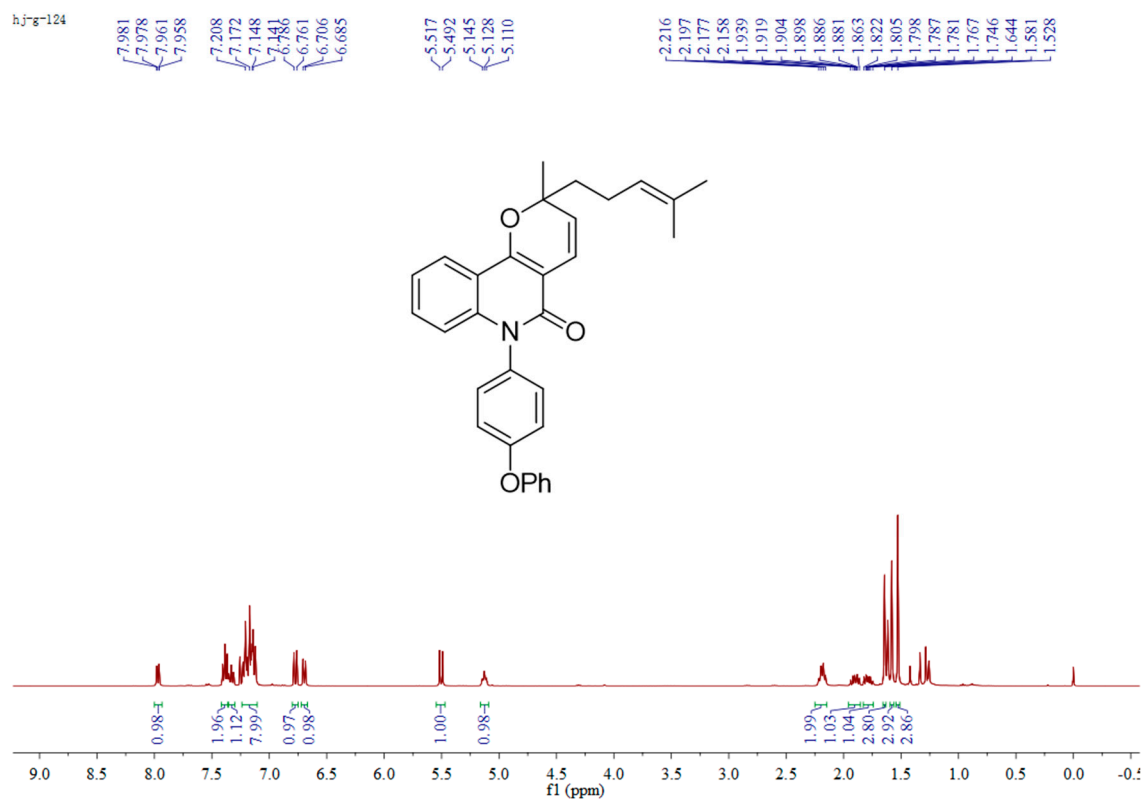

**Figure S18.**  $^{13}\text{C}$  NMR and  $^1\text{H}$  NMR (CDCl<sub>3</sub>) spectrum of compound **3r**

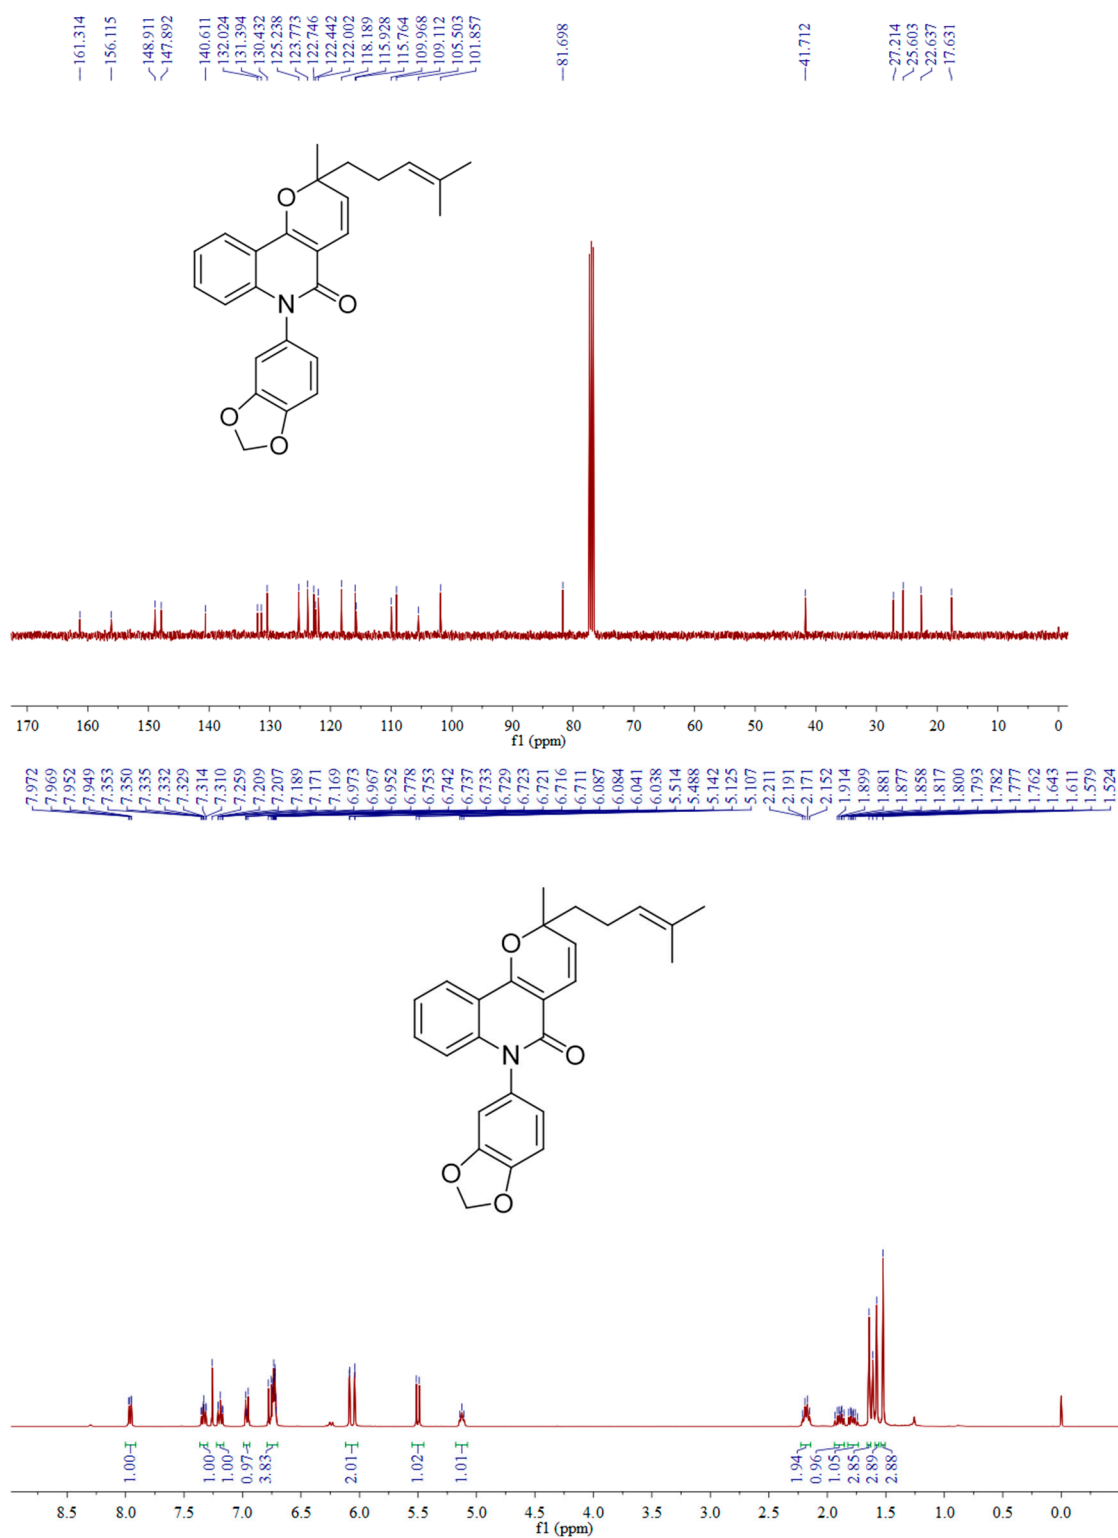

**Figure S19.** <sup>13</sup>C NMR and <sup>1</sup>H NMR (CDCl<sub>3</sub>) spectrum of compound 3s



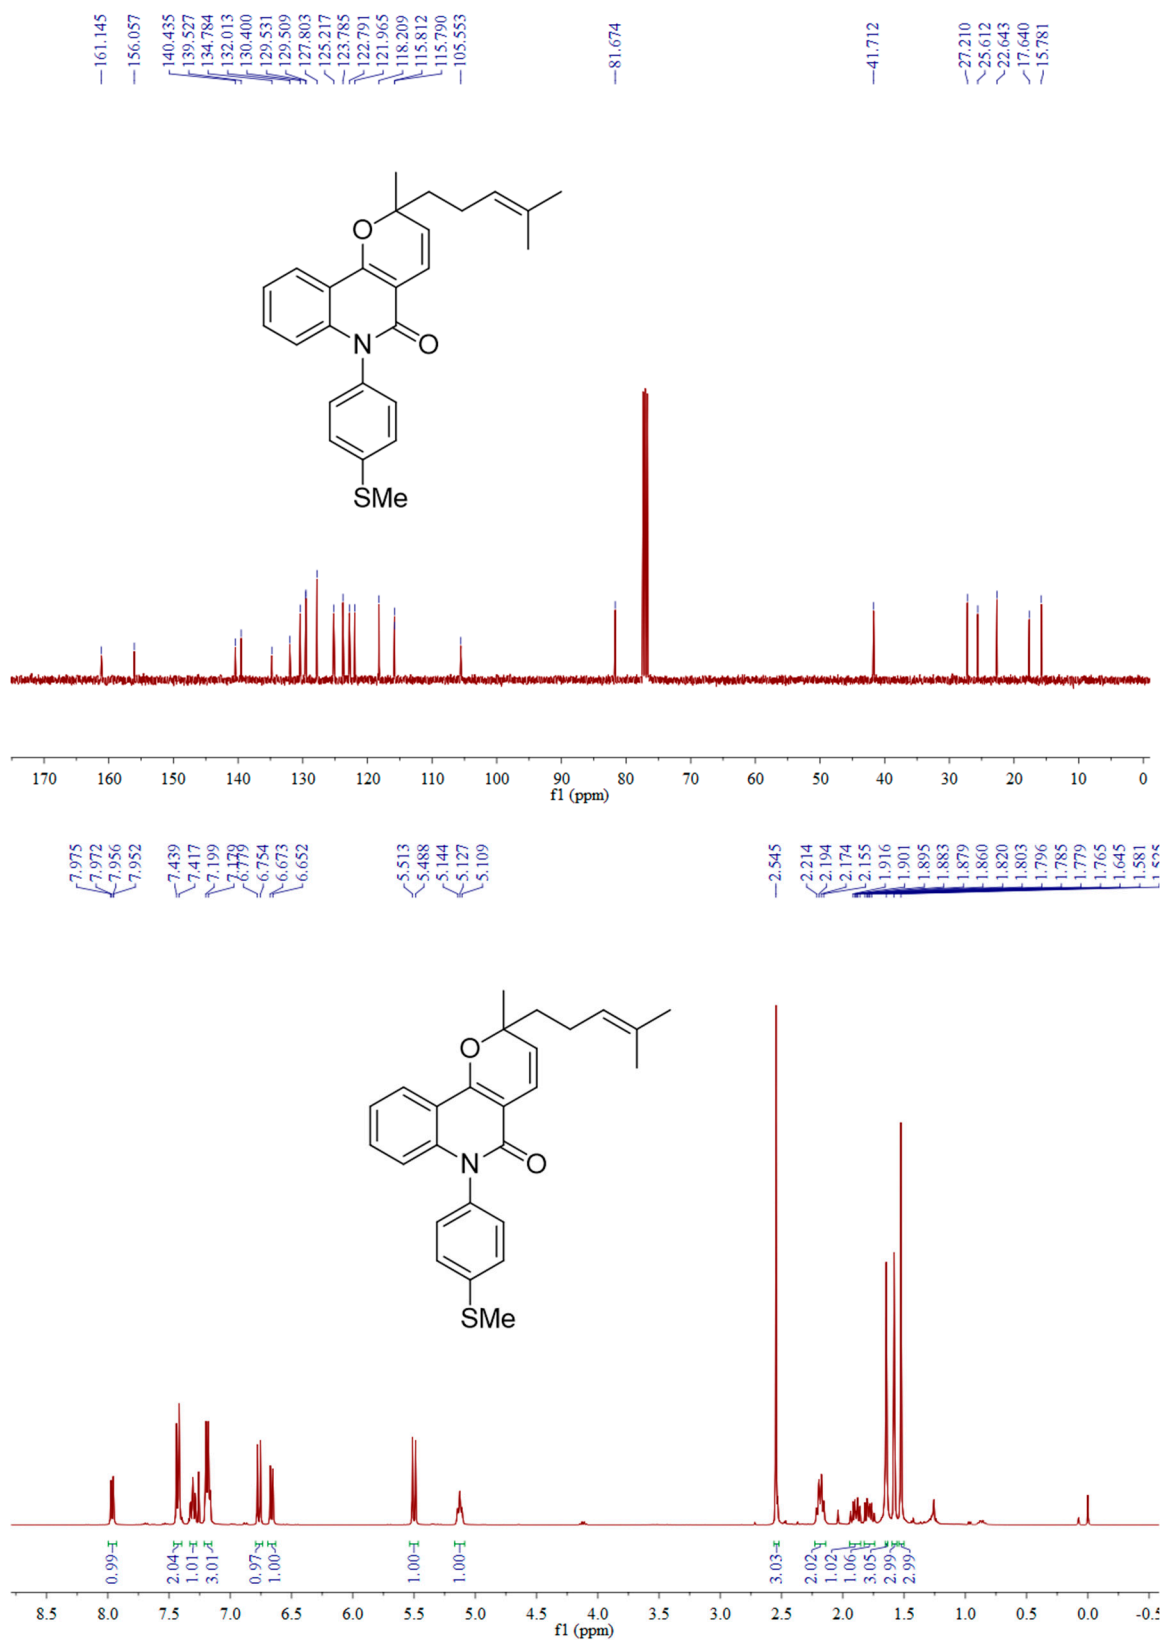

**Figure S20.** <sup>13</sup>C NMR and <sup>1</sup>H NMR (CDCl<sub>3</sub>) spectrum of compound **3t**

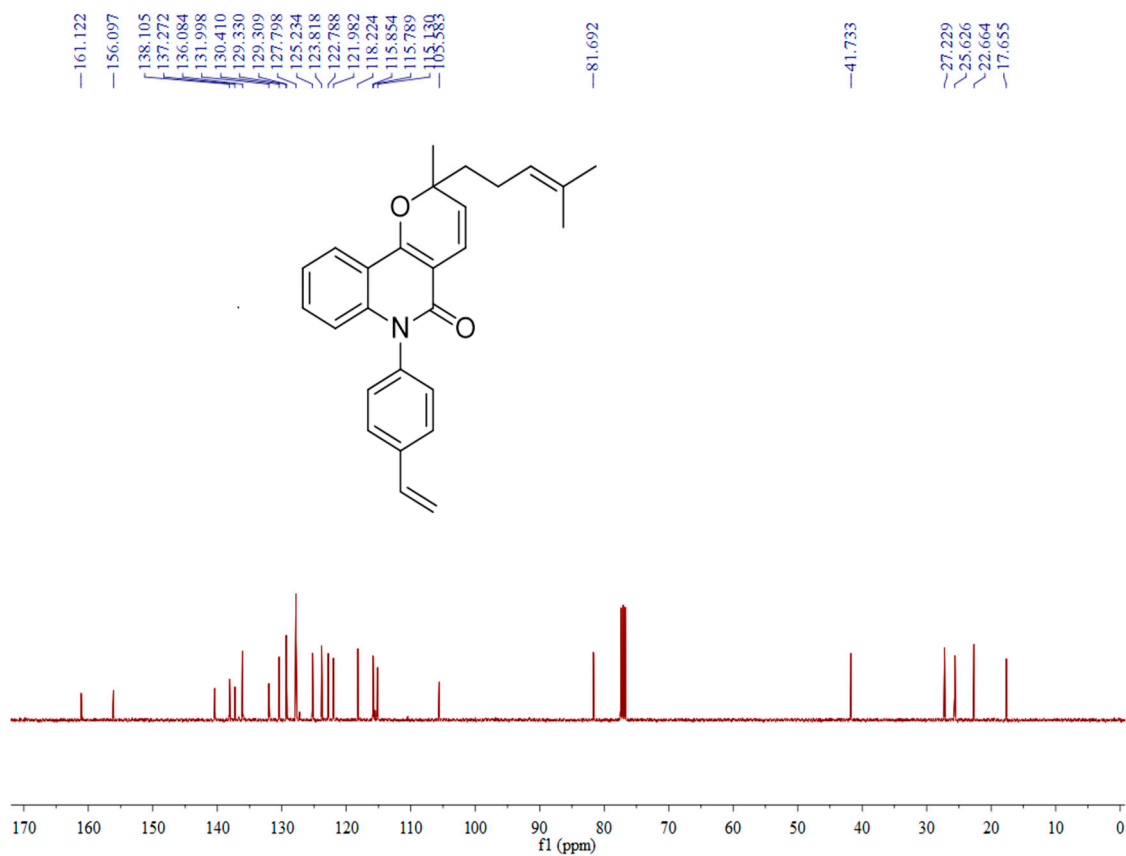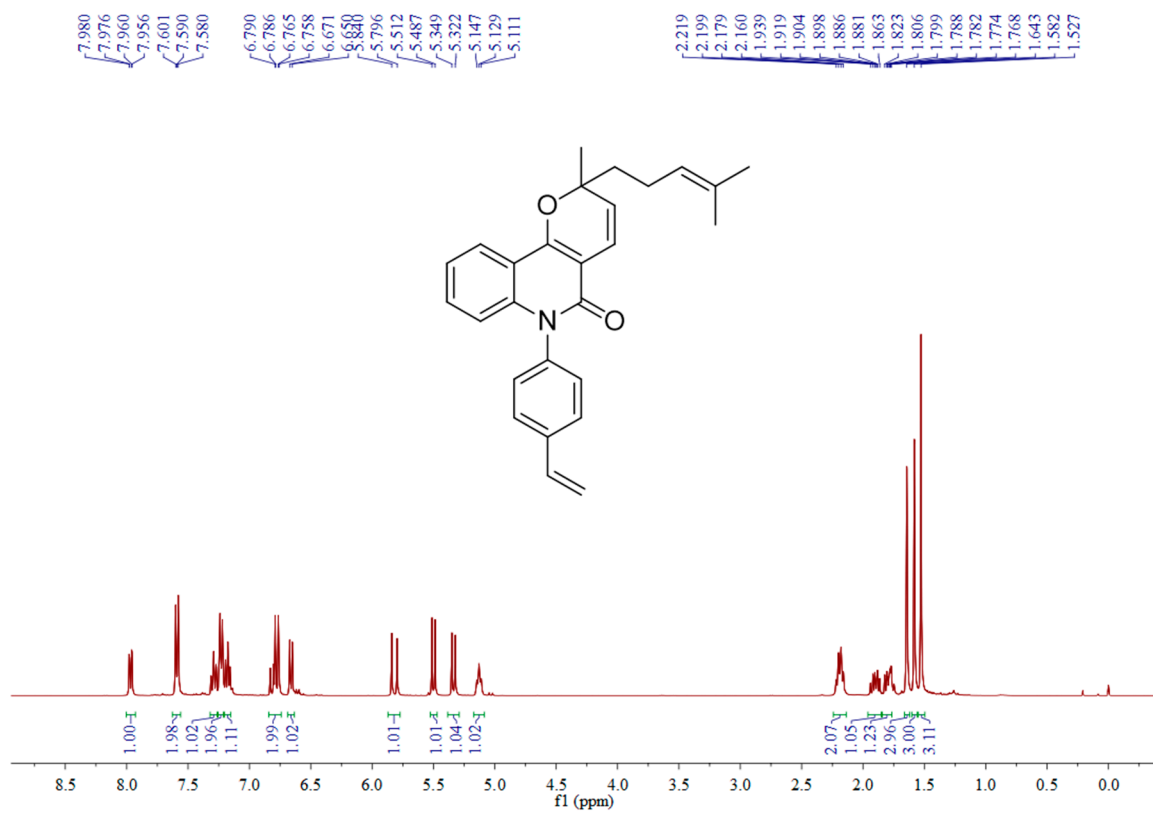

**Figure S21.** <sup>13</sup>C NMR and <sup>1</sup>H NMR (CDCl<sub>3</sub>) spectrum of compound **3u**

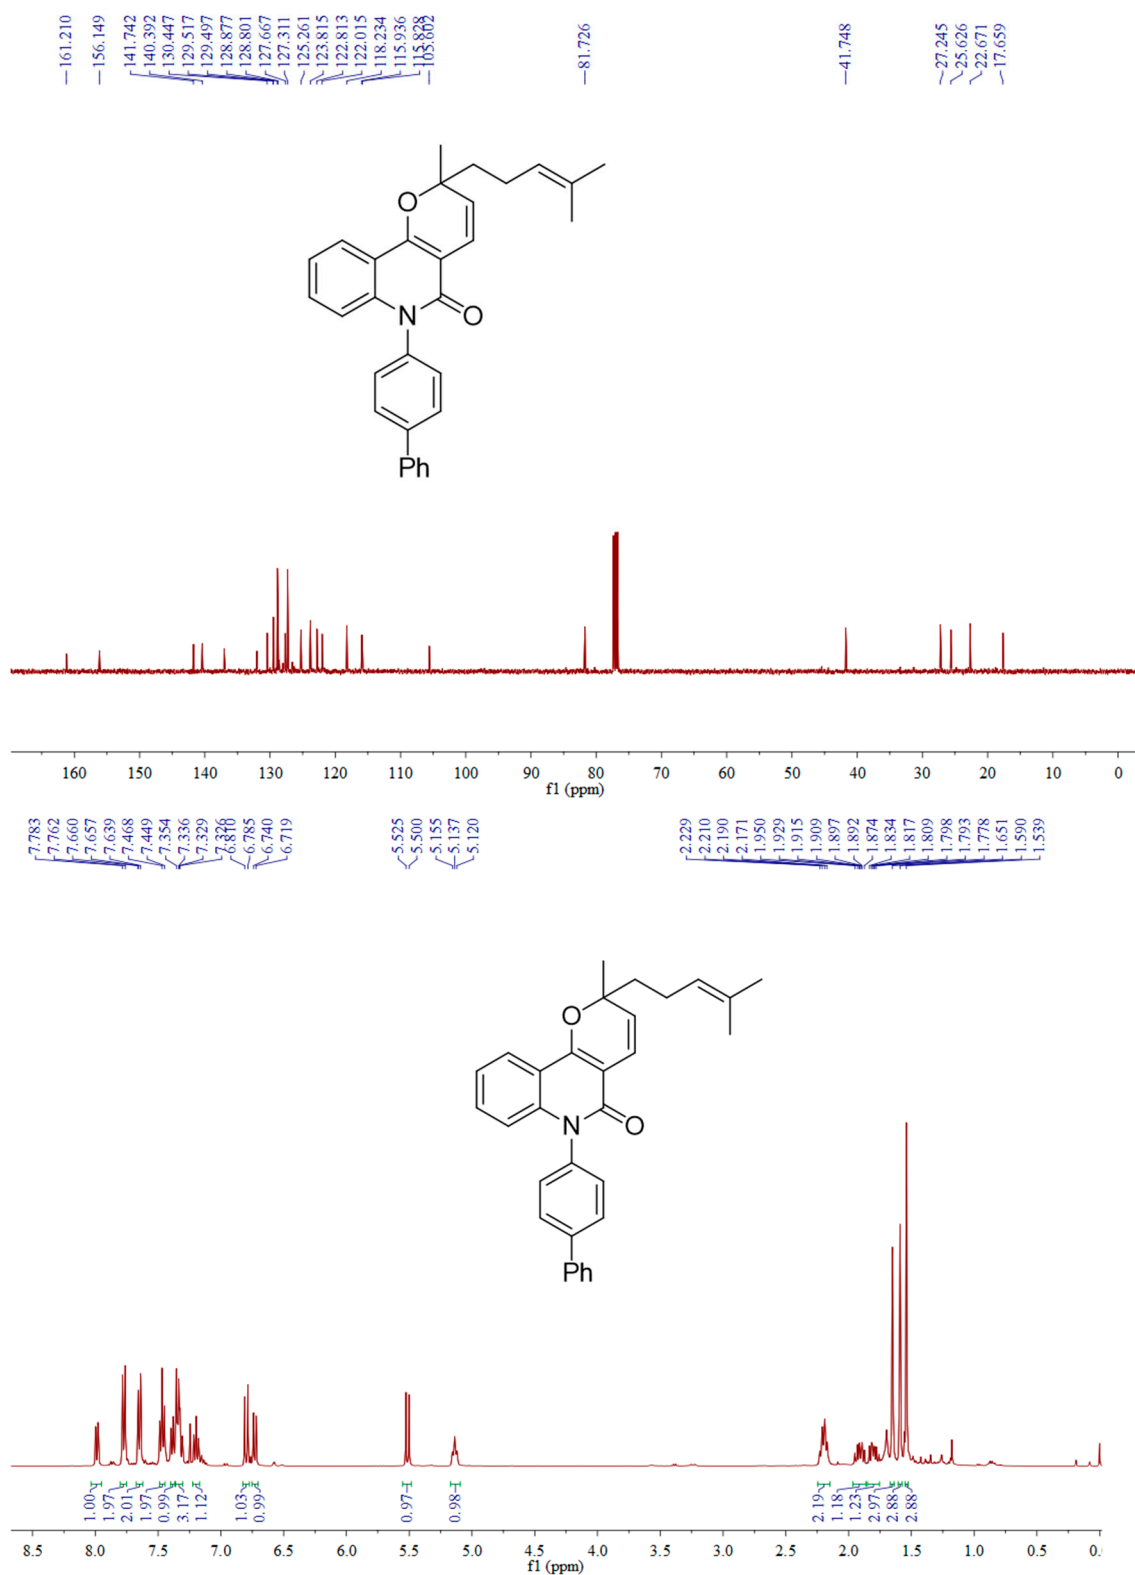

**Figure S22.** <sup>13</sup>C NMR and <sup>1</sup>H NMR (CDCl<sub>3</sub>) spectrum of compound **3v**

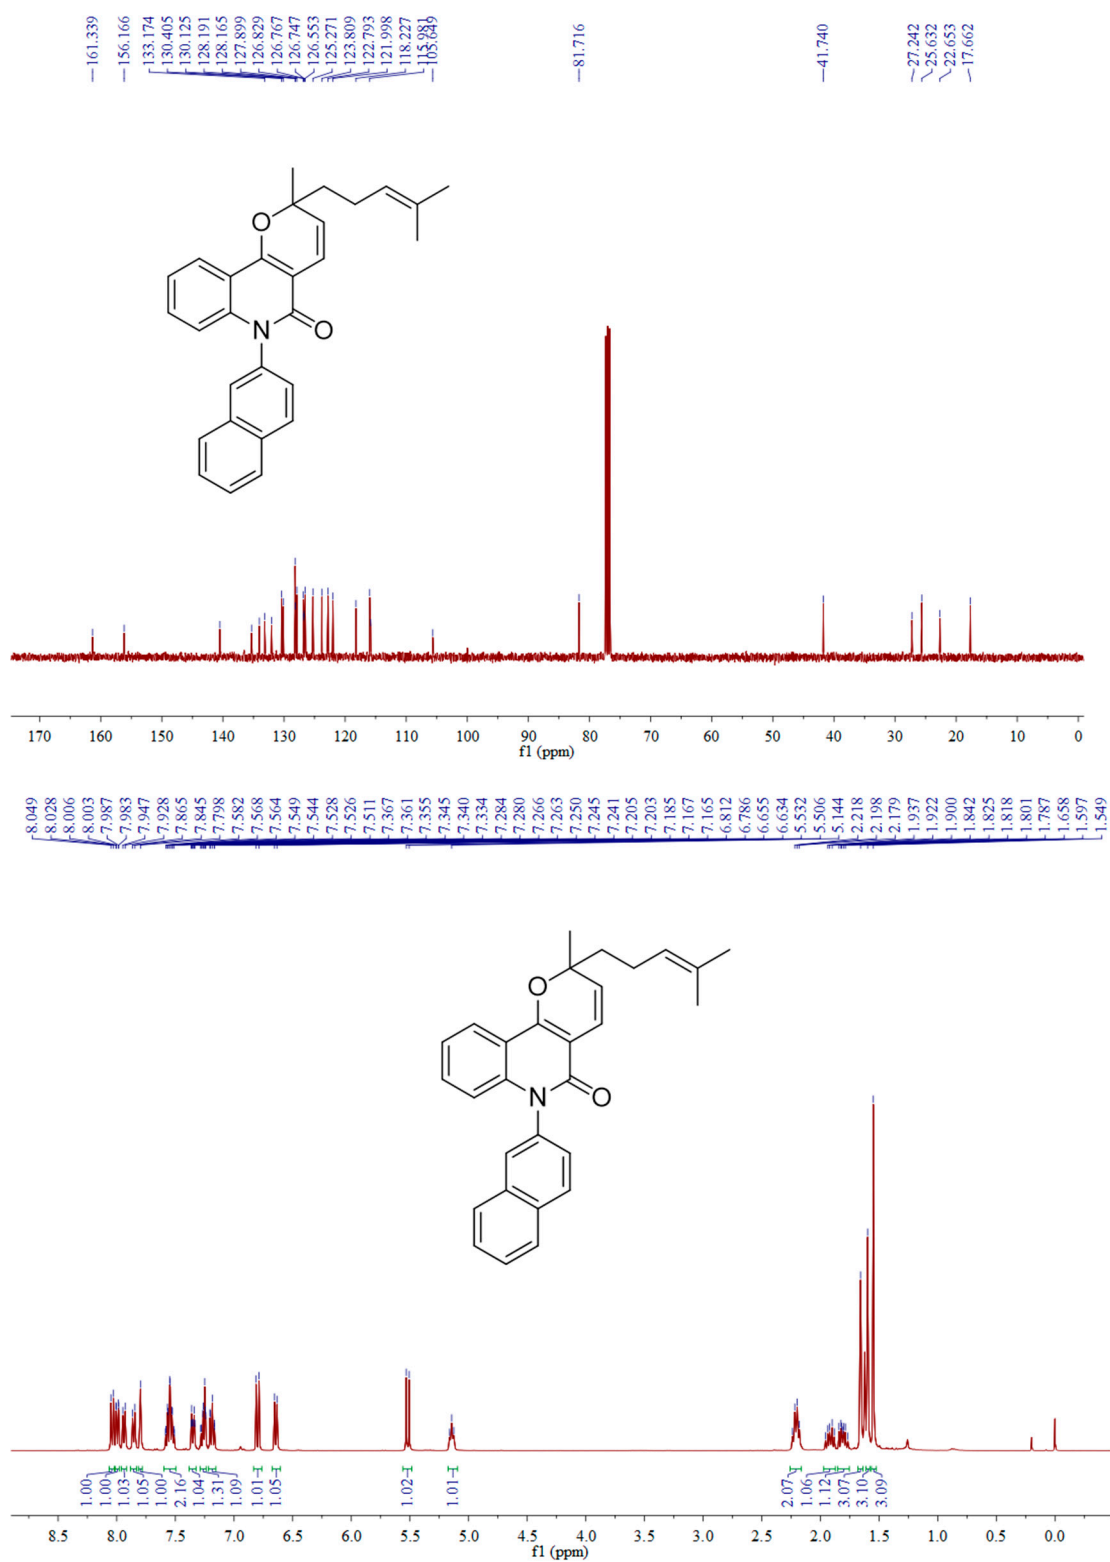

**Figure S23.** <sup>13</sup>C NMR and <sup>1</sup>H NMR (CDCl<sub>3</sub>) spectrum of compound **3w**

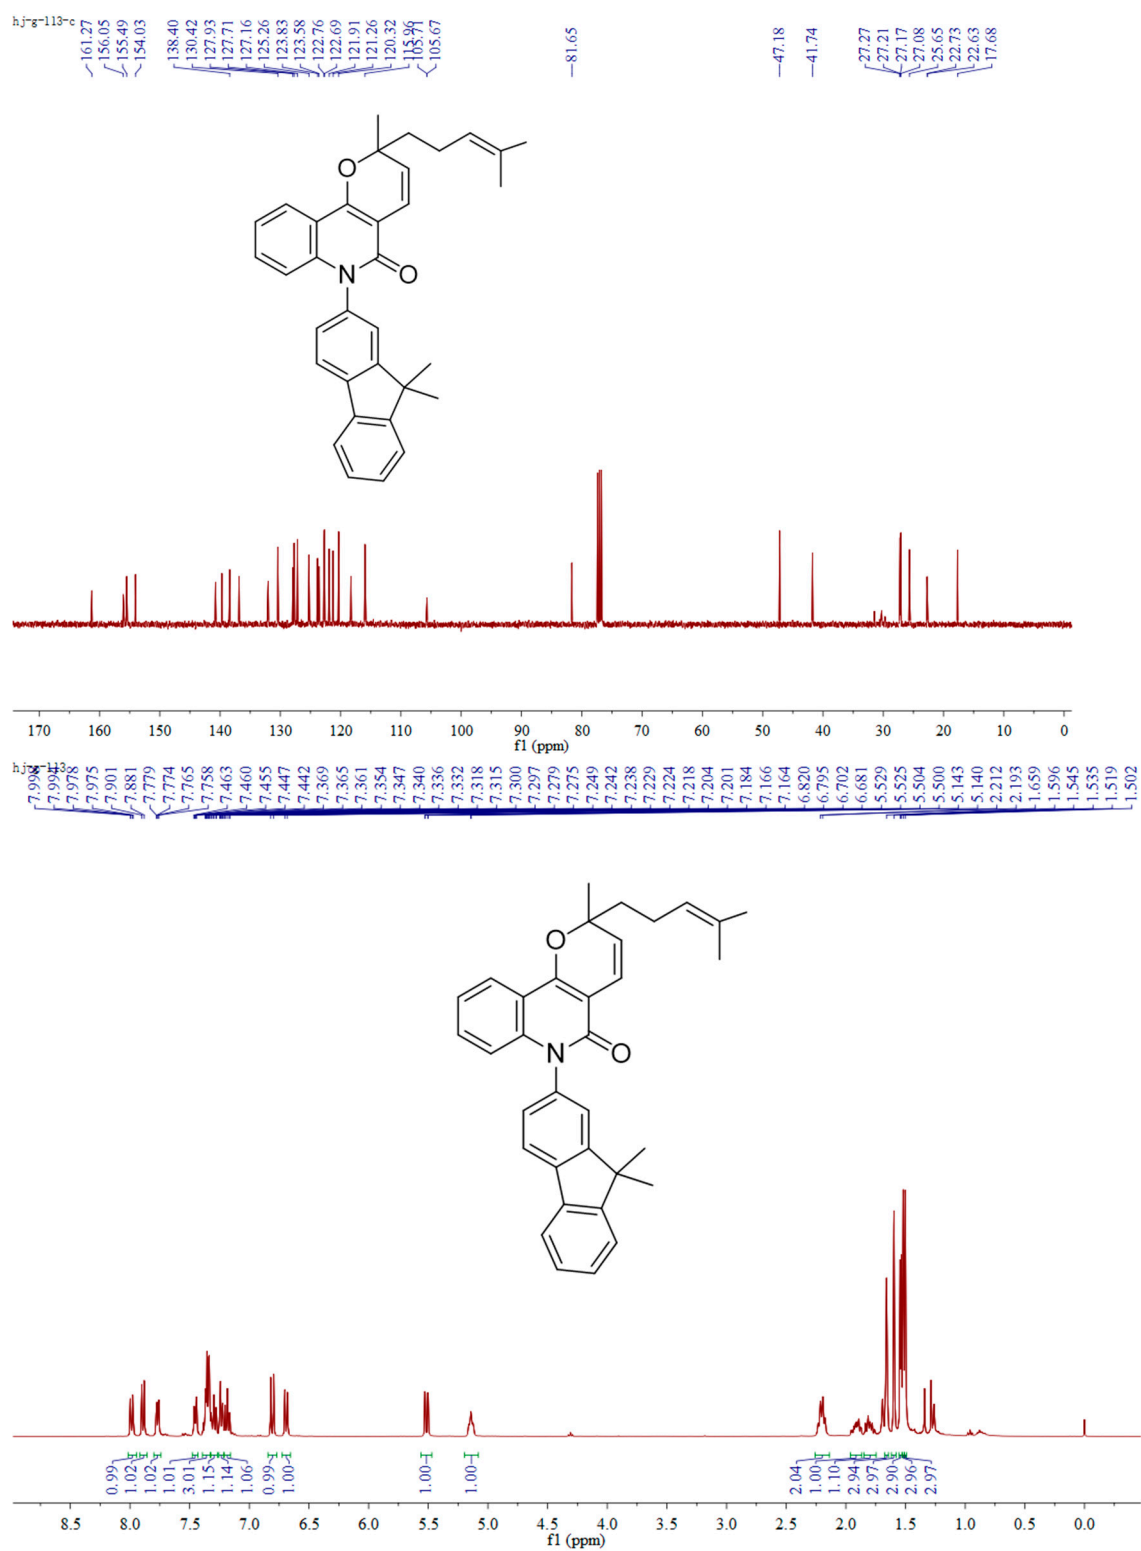

**Figure S24.** <sup>13</sup>C NMR and <sup>1</sup>H NMR (CDCl<sub>3</sub>) spectrum of compound **3x**

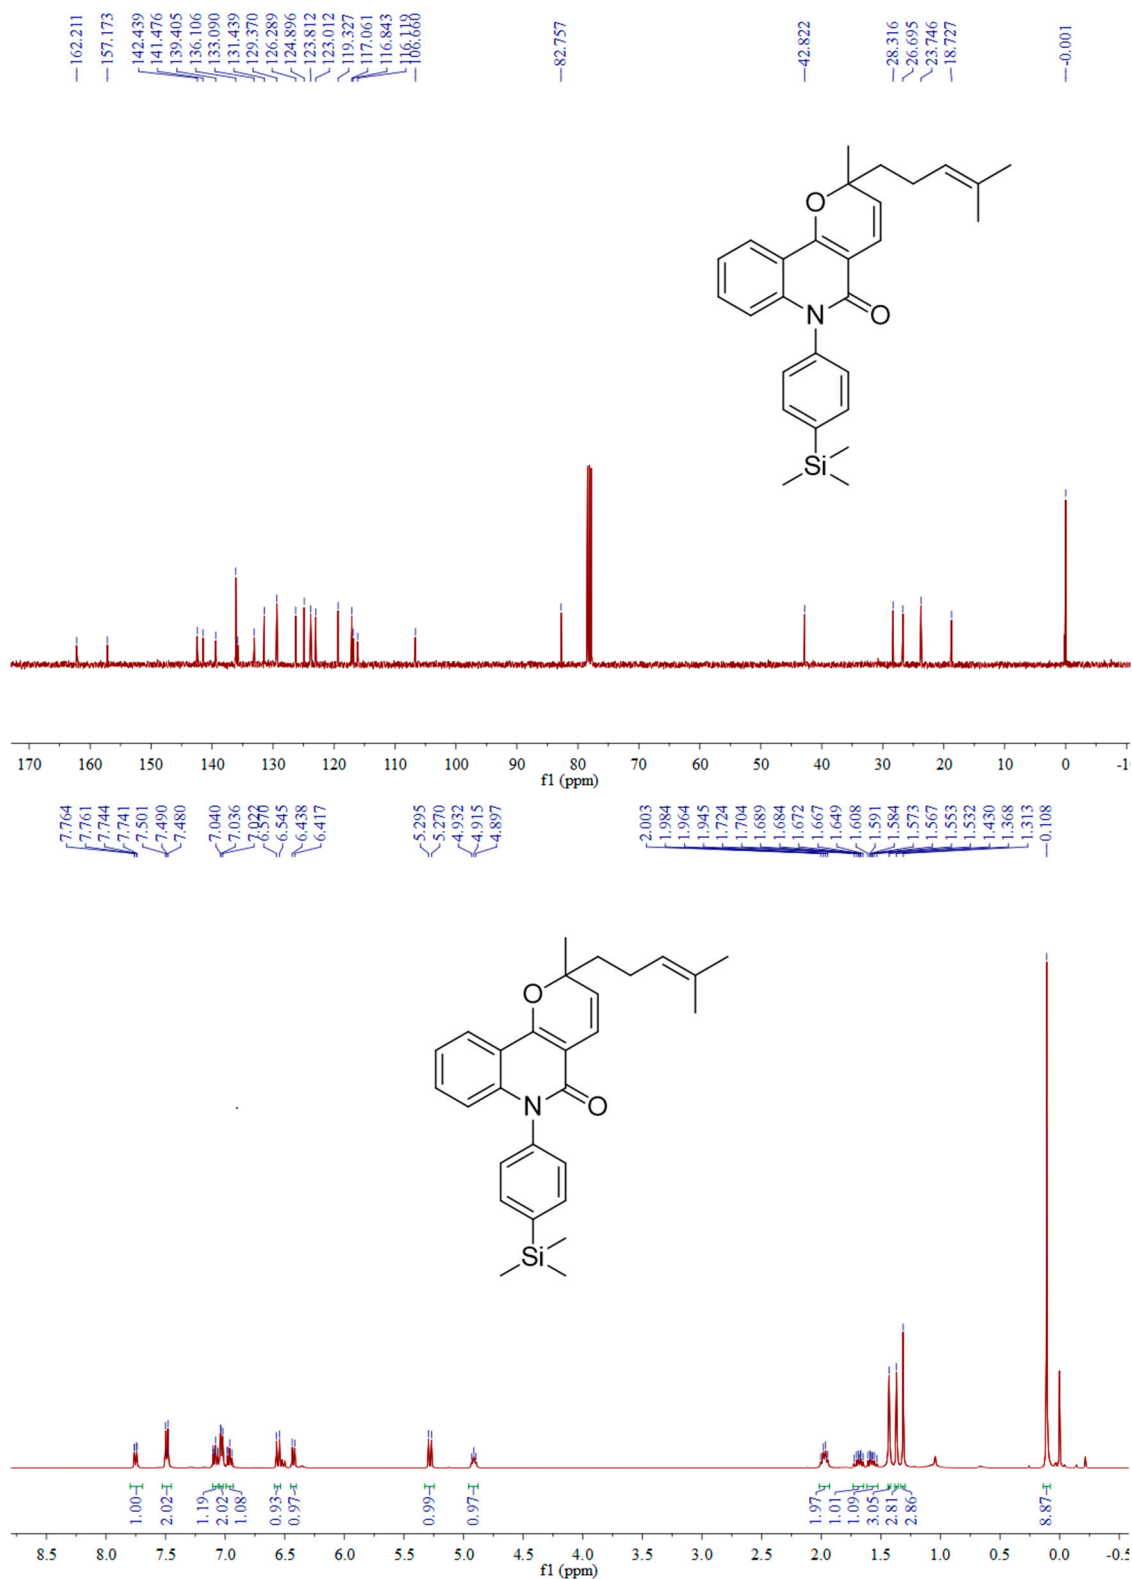

**Figure S25.** <sup>13</sup>C NMR and <sup>1</sup>H NMR (CDCl<sub>3</sub>) spectrum of compound **3y**
